# Supplementary material for: The Genetic Dissection of Nitrogen Use-Related Traits in Flax (Linum usitatissimum L.) at the Seedling Stage through the Integration of Multi-Locus GWAS, RNA-seq and Genomic Selection
Source: MDPI journal article supplement (doi:10.3390/ijms242417624), 2023-12-18
Supplement: s1 [file s1]

# The Genetic Dissection of Nitrogen Use-Related Traits in Flax (*Linum usitatissimum* L.) at the Seedling Stage through the Integration of Multi-Locus GWAS, RNA-seq and Genomic Selection

Braulio J. Soto-Cerda <sup>1,2,\*</sup>, Giovanni Larama <sup>3,4</sup>, Sylvie Cloutier <sup>5</sup>, Bourlaye Fofana <sup>6,\*</sup>,  
Claudio Inostroza-Blancheteau <sup>1,2</sup> and Gabriela Aravena <sup>1</sup>

<sup>1</sup> Departamento de Ciencias Agropecuarias y Acuícolas, Universidad Católica de Temuco, Rudecindo Ortega 02950, Temuco 4781312, Chile

<sup>2</sup> Núcleo de Investigación en Producción Alimentaria, Facultad de Recursos Naturales, Universidad Católica de Temuco, Rudecindo Ortega 02950, Temuco 4781312, Chile

<sup>3</sup> Center of Plant, Soil Interaction and Natural Resources Biotechnology, Scientific and Technological Bioresource Nucleus, Universidad de La Frontera, Temuco 4811230, Chile

<sup>4</sup> Biocontrol Research Laboratory, Universidad de La Frontera, Temuco 4811230, Chile

<sup>5</sup> Ottawa Research and Development Centre, Agriculture and Agri-Food Canada, 960 Carling Avenue, Ottawa, ON K1A 0C6, Canada

<sup>6</sup> Charlottetown Research and Development Centre, Agriculture and Agri-Food Canada, 440 University Avenue, Charlottetown, PE C1A 4N6, Canada

\* Correspondence: bsoto@uct.cl (B.J.S.-C.); bourlaye.fofana@agr.gc.ca (B.F.)

Supplementary material

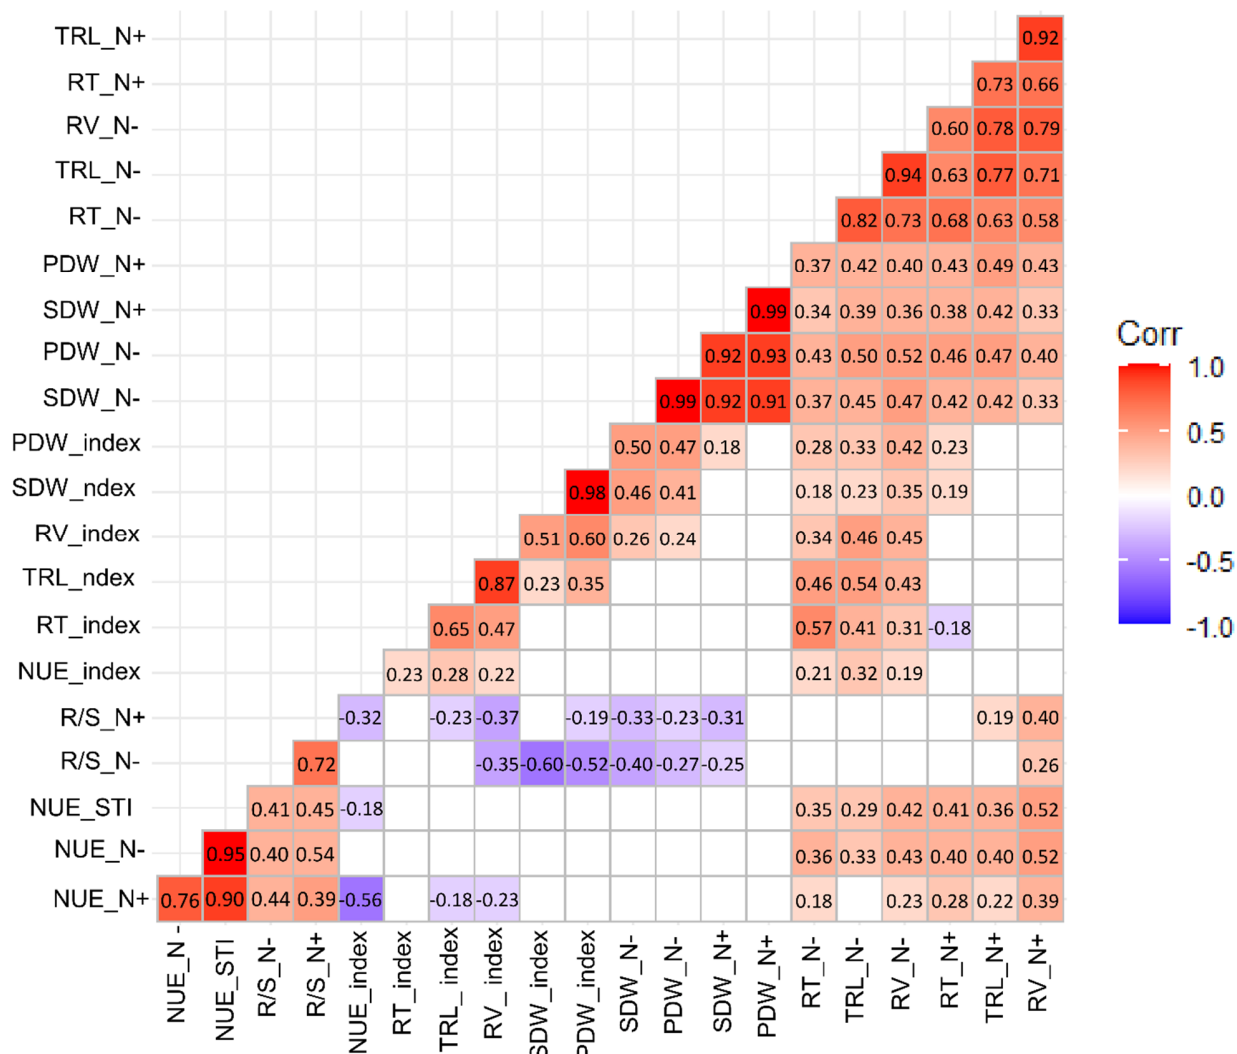

**Figure S1.** Pearson's correlations ( $P < 0.05$ ) of 21 NUE-related traits under depleted and optimum N conditions. TRL\_N-: Total root length N depleted; RV\_N-: Root volume N depleted; RT\_N-: Number of root tips N depleted; TRL\_N+: Total root length N optimum; RV\_N+: Root volume N optimum; RT\_N+: Number of root tips N optimum; PDW\_N-: Plant dry weight N depleted; SDW\_N-: Shoot dry weight N depleted; PDW\_N+: Plant dry weight N optimum; SDW\_N+: Shoot dry weight N optimum; TRL\_Index: Total root length stability index; RV\_Index: Root volume stability index; RT\_Index: Number of root tips stability index; PDW\_Index: Plant dry weight stability index; SDW\_Index: Shoot dry weight stability index; NUE\_Index: Nitrogen use efficiency stability index; R/S\_N-: Root to shoot ratio N depleted; R/S\_N+: Root to shoot ratio N optimum; NUE\_N-: Nitrogen use efficiency N depleted; NUE\_N+: Nitrogen use efficiency N optimum; NUE\_STI: Nitrogen use efficiency stress tolerance index.

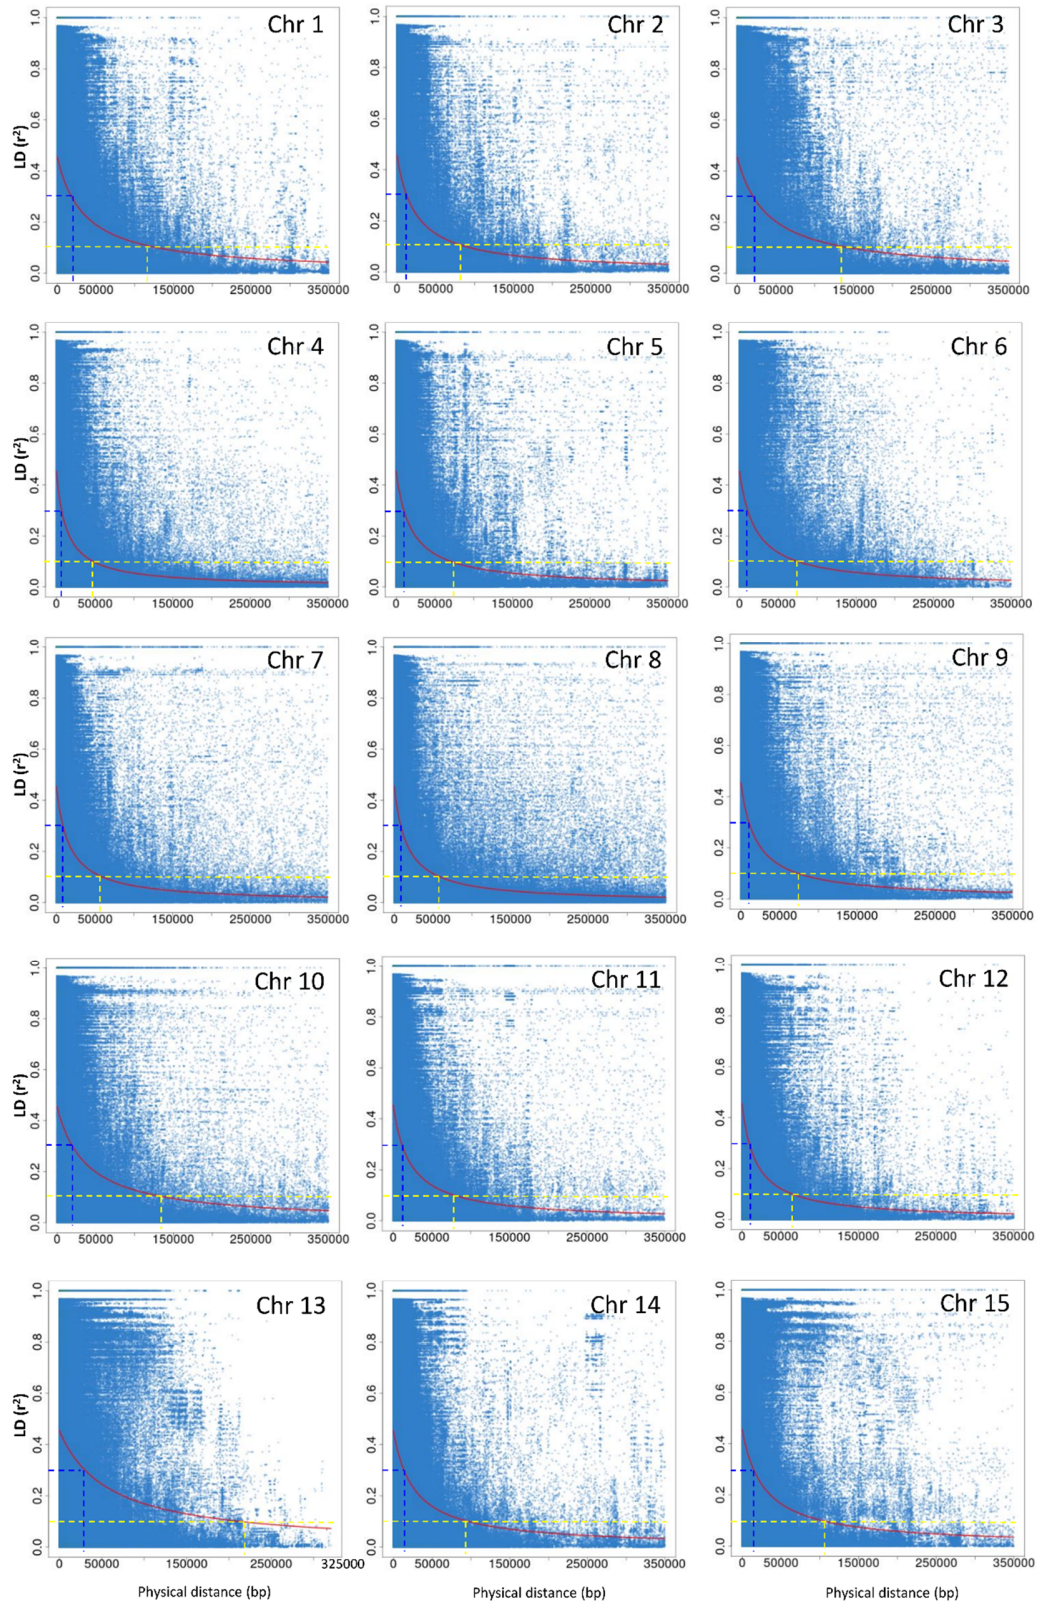

**Figure S2.** Linkage disequilibrium (LD) decay of  $r^2$  values (red line), against physical distance (bp) across the 15 chromosomes of *Linum usitatissimum*. Dashed blue and yellow lines indicate the cutoff value  $r^2 = 0.3$  and  $r^2 = 0.1$ , respectively, used to group neighboring QTNs into QTL and the chromosome-specific LD decay.

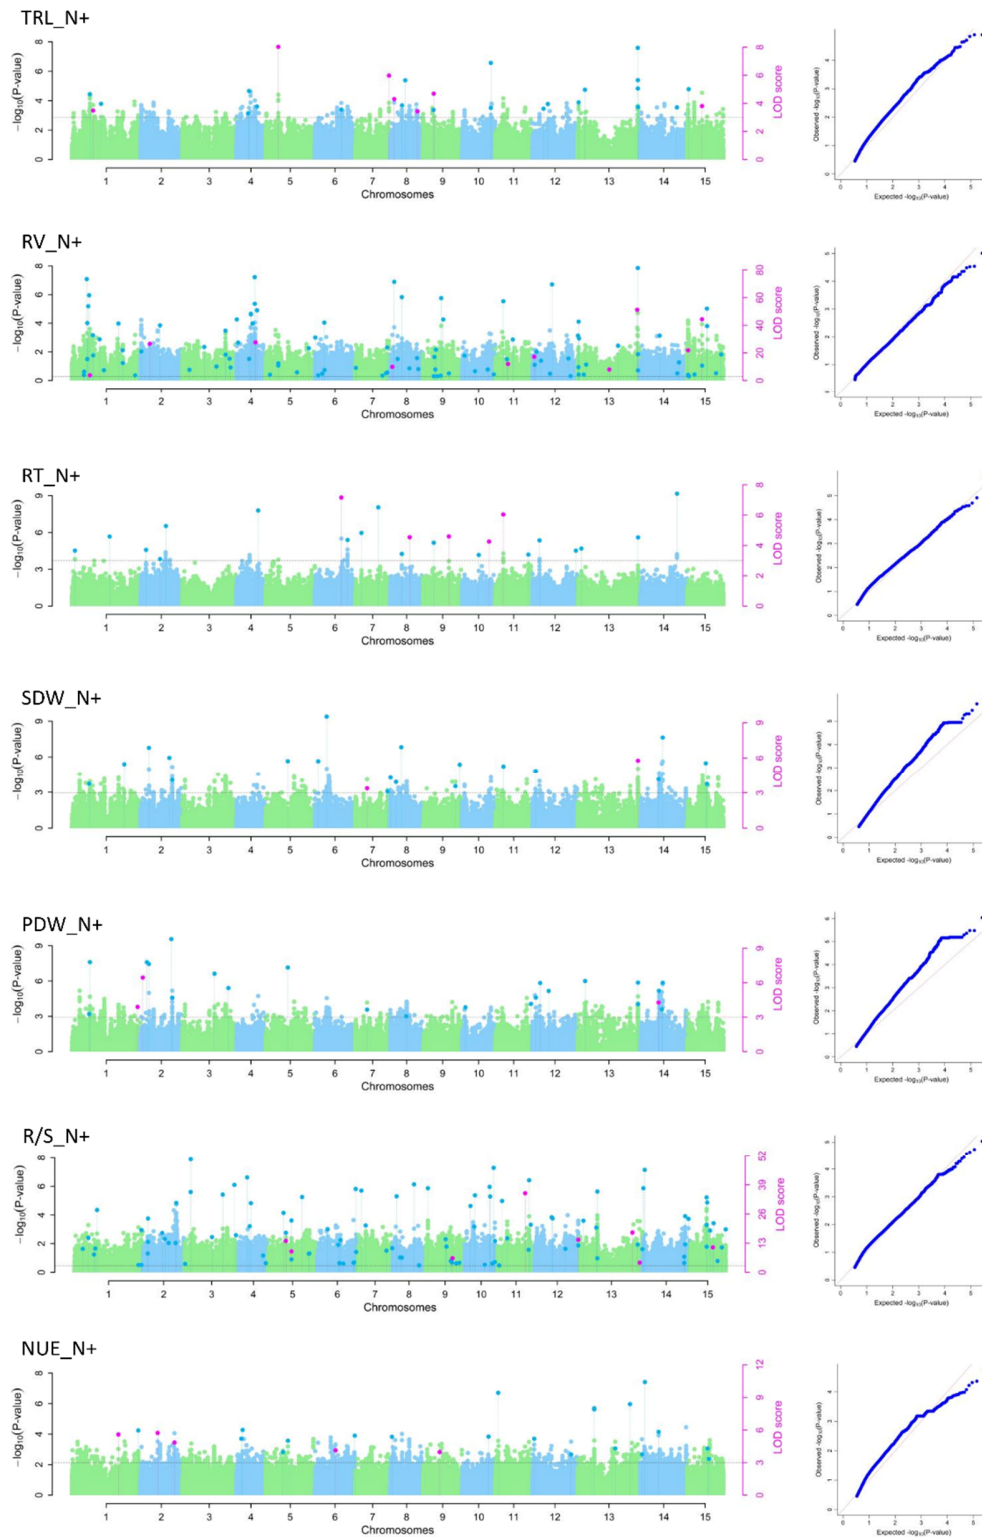



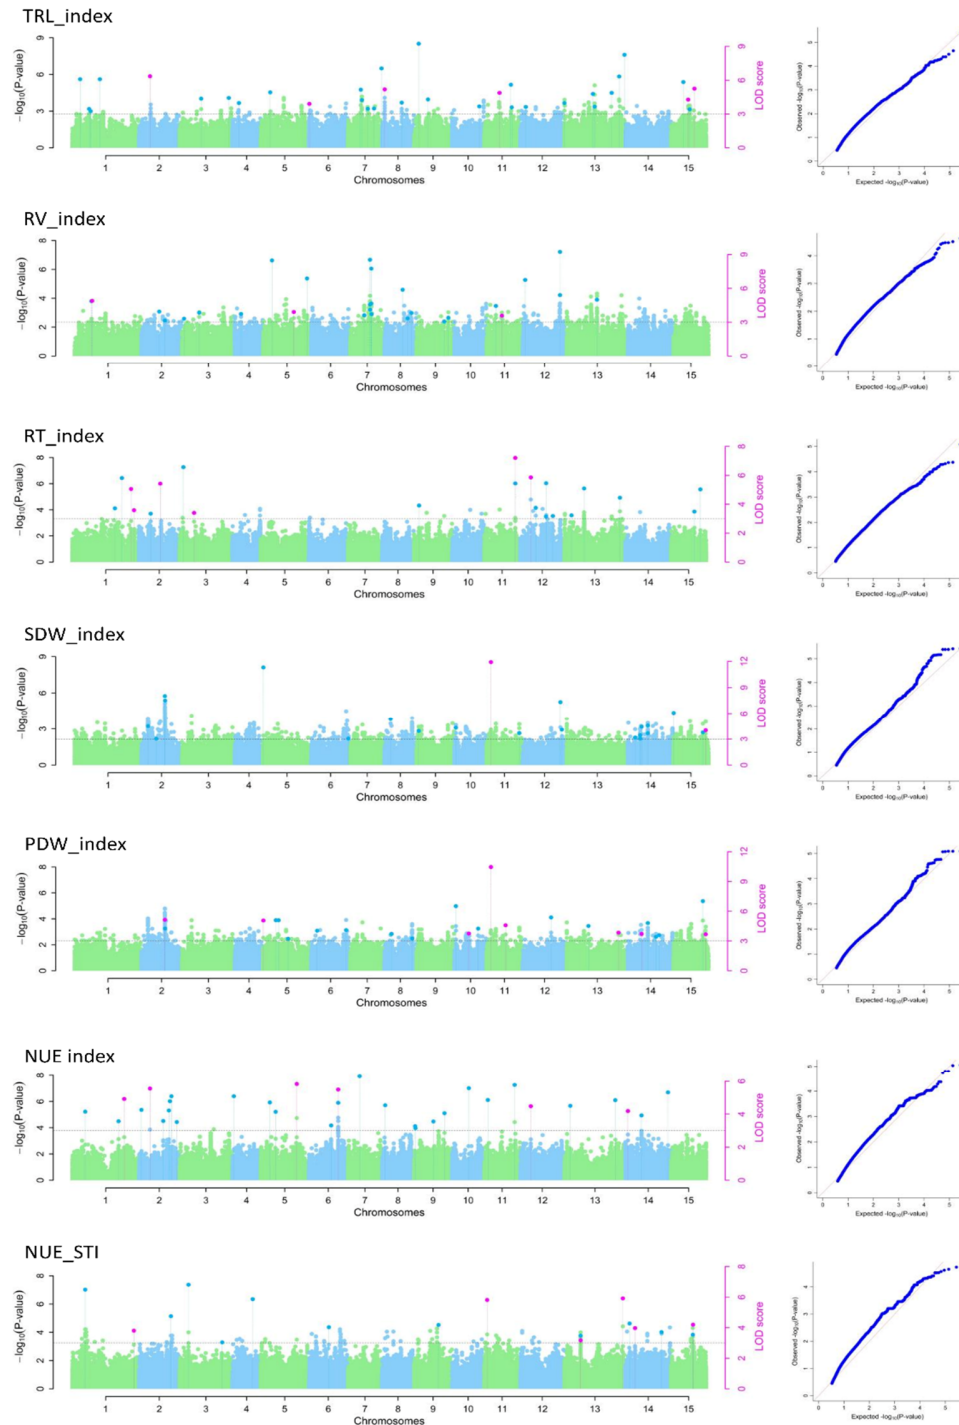

**Figure S3.** Manhattan (left panels) and quantile-quantile (Q-Q) plots (right panels) of multi-locus GWAS models of NUE-related traits. QTNs commonly identified by multiple approaches are indicated by the pink dots shown above dotted vertical lines; QTNs identified by a single model are represented by blue dots above vertical lines. The grey horizontal dotted line indicates the genome-wide significance threshold  $-\log_{10}(P)$  equivalent to the  $\text{LOD} > 3.0$  for multi-locus GWAS models. TRL\_N+: Total root length N optimum, RV\_N+: Root volume N optimum, RT\_N+: Number of root tips N optimum, SDW\_N+: Shoot dry weight N optimum, Plant dry weight N optimum, R/S\_N+: Root to shoot ratio N optimum, NUE\_N+: Nitrogen use efficiency N optimum. TRL\_Index, RV\_Index, RT\_Index, SDW\_Index, PDW\_Index, and NUE\_Index represent the stability indices for TRL, RV, RT, SDW, PDW and NUE measured under contrasting N conditions. NUE\_STI: Nitrogen use efficiency stress tolerance index.

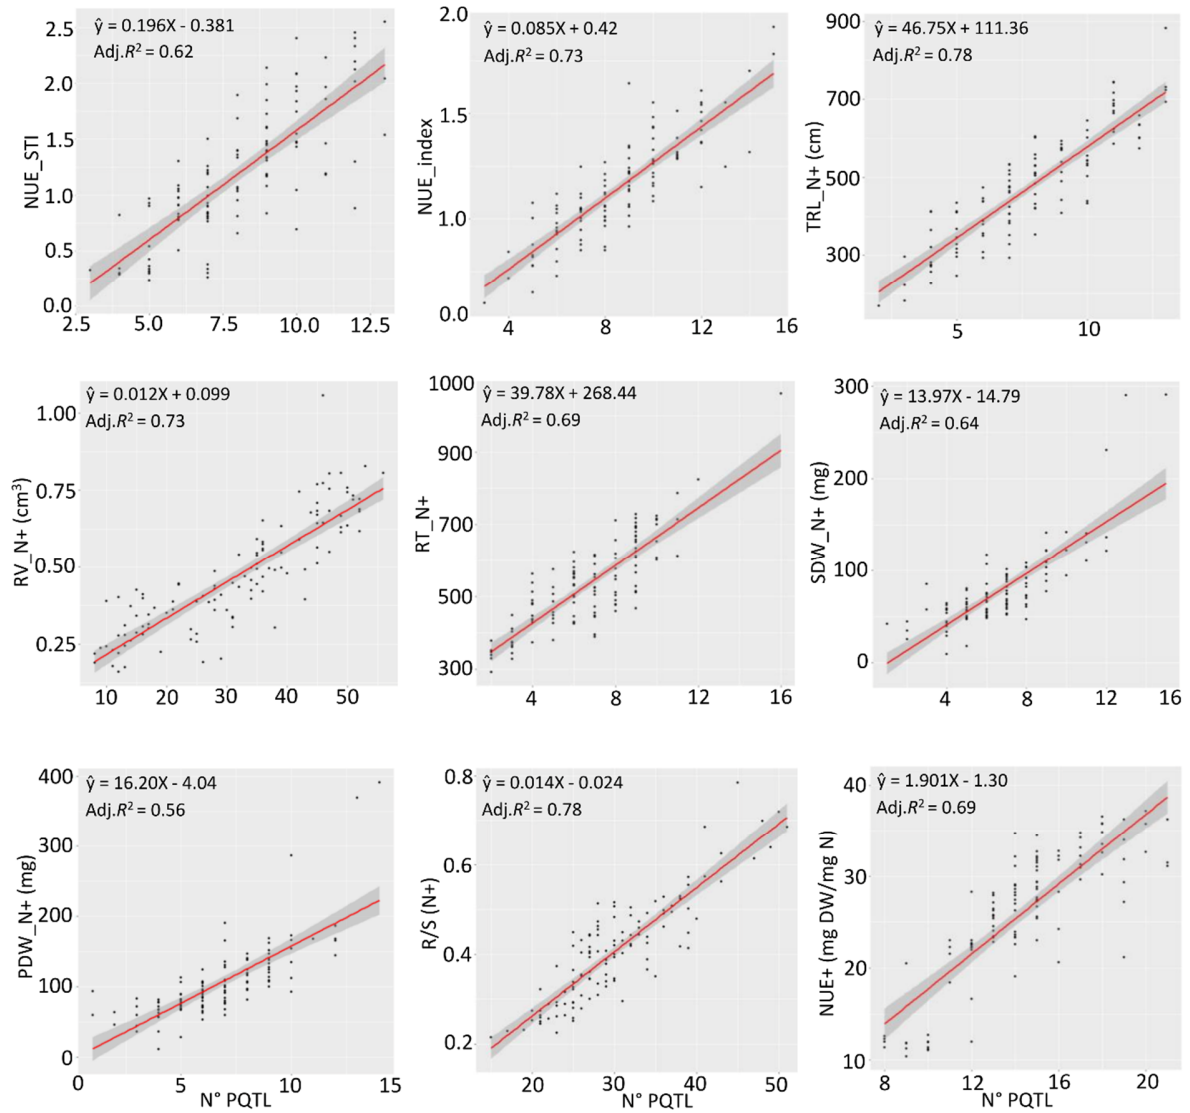

**Figure S4.** Simple regression analyses of QTL on trait for NUE-related traits and the phenotypic variation explained (adjR²) for all detected QTL for each individual trait. NUE\_STI: Nitrogen use efficiency stress tolerance index, NUE\_Index: Nitrogen use efficiency index, TRL\_N+: Total root length N optimum, RV\_N+: Root volume N optimum, RT\_N+: Number of root tips N optimum, SDW\_N+: Shoot dry weight N optimum, Plant dry weight N optimum, R/S\_N+: Root to shoot ratio N optimum, NUE\_N+: Nitrogen use efficiency N optimum.

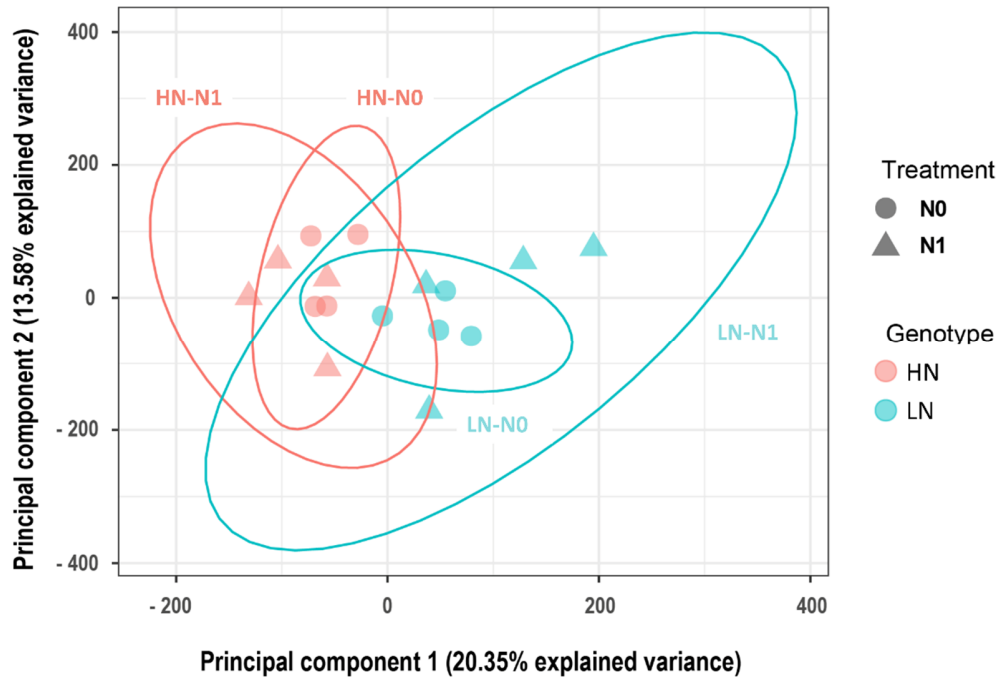

**Figure S5.** Principal component analysis (PCA) among the RNA-seq. samples generated under N contrasting conditions from four biological replicates per genotype. HN: High NUE genotype, LN: Low NUE genotype, N0: Depleted N treatment, N1: Optimum N treatment.

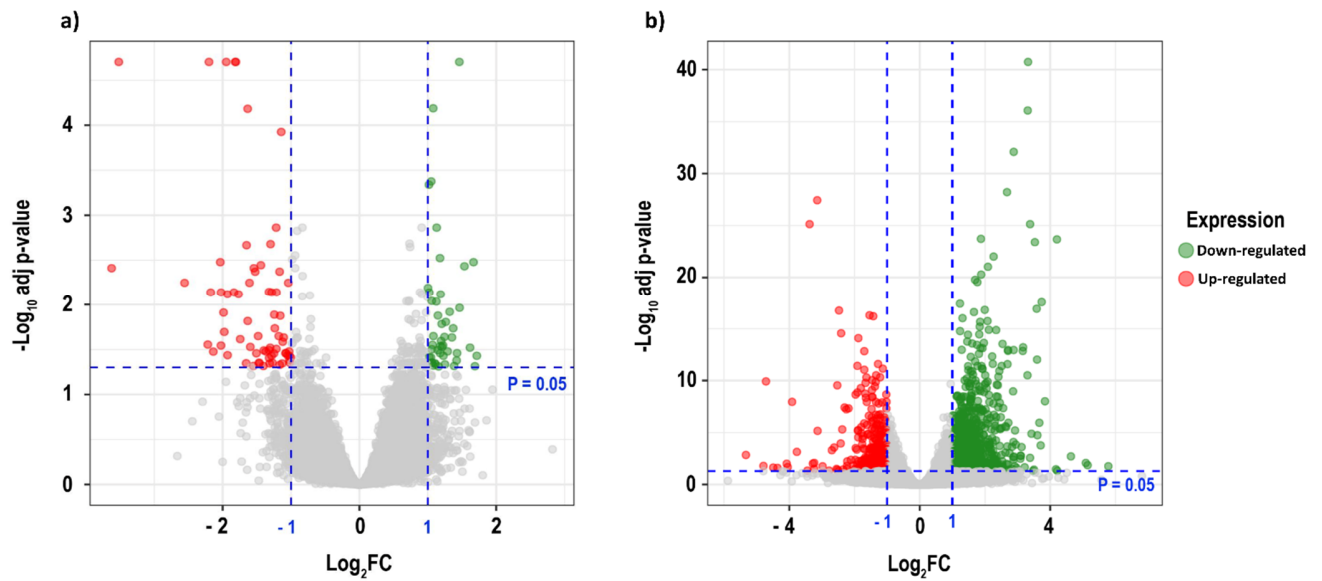

**Figure S6.** Volcano plots of up-regulated and down-regulated DEGs in roots under N contrasting conditions in flax. **a)** High NUE (HN) genotype. **b)** Low NUE (LN) genotype. Dotted vertical and horizontal blue lines indicate the  $\text{Log}_2\text{FC} \geq 1$  and the FDR-adjusted P value  $< 0.05$ , respectively.

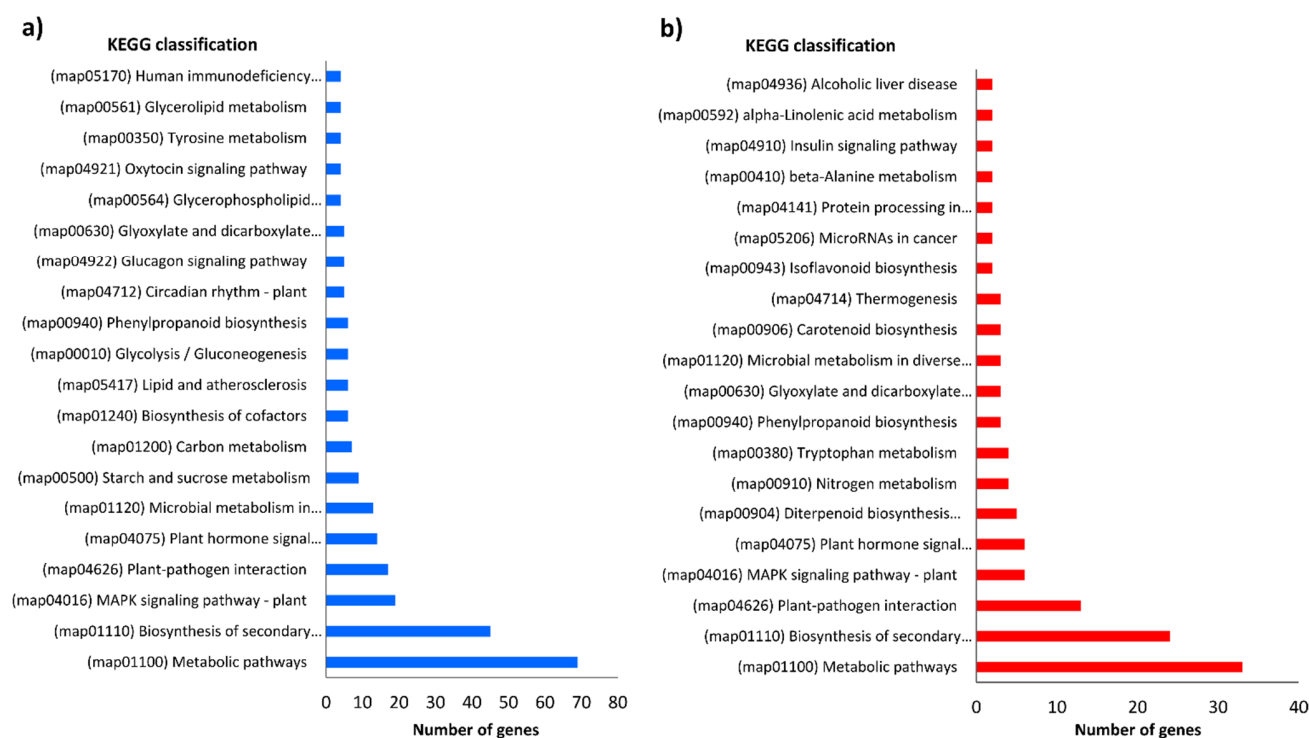

**Figure S7.** KEGG pathway annotation for the DEGs identified in root tissue for the LN genotype. **(a)** The twenty top KEGG enrichment pathways of up-regulated DEGs in LN genotype. **(b)** The twenty top KEGG pathways of down-regulated DEGs in LN genotype.



**Table S1.** Flax germplasm used for multi-locus GWAS analyses.

| <b>Accession</b> | <b>Morphotype</b> | <b>Origin</b>            |
|------------------|-------------------|--------------------------|
| F_AFG_U_CN100952 | Fiber             | Afganistan               |
| F_BLR_C_CN101038 | Fiber             | Belarus                  |
| F_CAN_C_G1186_94 | Fiber             | Canada                   |
| F_CHN_B_CN101416 | Fiber             | China                    |
| F_CZE_C_CN98704  | Fiber             | Czech Republic           |
| F_EGY_C_CN98826  | Fiber             | Egypt                    |
| F_FRA_C_CN101392 | Fiber             | France                   |
| F_FRA_C_CN18986  | Fiber             | France                   |
| F_FRA_L_CN98710  | Fiber             | France                   |
| F_JPN_C_CN98072  | Fiber             | Japan                    |
| F_NLD_C_CN18987  | Fiber             | The Netherlands          |
| F_NLD_C_CN18997  | Fiber             | The Netherlands          |
| F_NLD_C_CN97424  | Fiber             | The Netherlands          |
| F_NLD_U_CN101407 | Fiber             | The Netherlands          |
| F_ROM_U_CN101405 | Fiber             | Romania                  |
| F_RUS_B_CN101039 | Fiber             | Russia                   |
| F_RUS_B_CN101114 | Fiber             | Russia                   |
| F_RUS_B_CN101116 | Fiber             | Russia                   |
| F_RUS_B_CN101127 | Fiber             | Russia                   |
| F_RUS_C_CN101099 | Fiber             | Russia                   |
| F_RUS_C_CN101154 | Fiber             | Russia                   |
| F_RUS_C_CN32542  | Fiber             | Russia                   |
| F_RUS_L_CN97503  | Fiber             | Russia                   |
| F_RUS_L_CN97531  | Fiber             | Russia                   |
| F_RUS_U_CN101348 | Fiber             | Russia                   |
| F_RUS_U_CN101394 | Fiber             | Russia                   |
| F_RUS_U_CN101396 | Fiber             | Russia                   |
| F_RUS_U_CN101402 | Fiber             | Russia                   |
| F_SWE_C_Atlas    | Fiber             | Sweden                   |
| F_TUR_U_CN101382 | Fiber             | Turkey                   |
| F_TUR_U_CN101386 | Fiber             | Turkey                   |
| F_UKR_U_CN101378 | Fiber             | Ukraine                  |
| F_UKR_U_CN101379 | Fiber             | Ukraine                  |
| F_UNK_C_CN33393  | Fiber             | Unknown                  |
| F_USA_B_CN98926  | Fiber             | United States of America |
| O_ARG_B_CN98037B | Oil               | Argentina                |
| O_ARG_C_CN97214  | Oil               | Argentina                |
| O_ARG_C_CN97961  | Oil               | Argentina                |
| O_ARG_C_CN97967  | Oil               | Argentina                |
| O_ARG_C_CN98007  | Oil               | Argentina                |
| O_ARG_C_CN98027  | Oil               | Argentina                |
| O_ARG_C_CN98039  | Oil               | Argentina                |
| O_AUS_C_CN98984  | Oil               | Australia                |
| O_CAN_B_CN101496 | Oil               | Canada                   |

|                  |     |                 |
|------------------|-----|-----------------|
| O_CAN_B_CN101560 | Oil | Canada          |
| O_CAN_B_CN101596 | Oil | Canada          |
| O_CAN_B_CN101598 | Oil | Canada          |
| O_CAN_C_CDCCGold | Oil | Canada          |
| O_CAN_C_CN101413 | Oil | Canada          |
| O_CAN_C_CN18981  | Oil | Canada          |
| O_CAN_C_CN19003  | Oil | Canada          |
| O_CAN_C_CN19004  | Oil | Canada          |
| O_CAN_C_CN19159  | Oil | Canada          |
| O_CAN_C_CN33388  | Oil | Canada          |
| O_CAN_C_CN33389  | Oil | Canada          |
| O_CAN_C_CN52732  | Oil | Canada          |
| O_CAN_C_CN97633  | Oil | Canada          |
| O_CAN_C_Macbeth  | Oil | Canada          |
| O_CAN_C_Shape    | Oil | Canada          |
| O_DEU_B_CN97430  | Oil | Germany         |
| O_DEU_C_CN100881 | Oil | Germany         |
| O_DEU_C_CN97886  | Oil | Germany         |
| O_FRA_B_CN100863 | Oil | France          |
| O_GBR_C_CN101265 | Oil | United Kingdom  |
| O_GEO_U_CN101366 | Oil | Georgia         |
| O_HUN_C_CN100883 | Oil | Hungary         |
| O_HUN_C_CN97287  | Oil | Hungary         |
| O_HUN_C_CN97300  | Oil | Hungary         |
| O_HUN_C_CN98263  | Oil | Hungary         |
| O_HUN_C_CN98263B | Oil | Hungary         |
| O_HUN_C_CN98275  | Oil | Hungary         |
| O_HUN_C_CN98854  | Oil | Hungary         |
| O_IND_C_CN101208 | Oil | India           |
| O_IND_C_CN98057  | Oil | India           |
| O_IND_C_CN98135  | Oil | India           |
| O_IND_C_CN98250  | Oil | India           |
| O_IND_C_CN98982  | Oil | India           |
| O_IRL_C_CN98192  | Oil | Ireland         |
| O_JPN_C_CN97470  | Oil | Japan           |
| O_LTU_B_CN101240 | Oil | Lithuania       |
| O_LTU_C_CN101237 | Oil | Lithuania       |
| O_MAR_B_CN101026 | Oil | Morocco         |
| O_NLD_C_CN18993  | Oil | The Netherlands |
| O_NLD_C_CN98056  | Oil | The Netherlands |
| O_NLD_C_CN98056B | Oil | The Netherlands |
| O_PAK_C_CN97064  | Oil | Pakistan        |
| O_PAK_C_CN97096  | Oil | Pakistan        |
| O_PAK_C_CN97103  | Oil | Pakistan        |
| O_PAK_C_CN98237  | Oil | Pakistan        |

|                   |         |                          |
|-------------------|---------|--------------------------|
| O_PAK_C_CN98239   | Oil     | Pakistan                 |
| O_ROM_C_CN100674  | Oil     | Romania                  |
| O_RUS_B_CN101241  | Oil     | Russia                   |
| O_RUS_B_CN101301  | Oil     | Russia                   |
| O_RUS_C_CN96846   | Oil     | Russia                   |
| O_RUS_C_CN97475   | Oil     | Russia                   |
| O_RUS_C_CN97489   | Oil     | Russia                   |
| O_RUS_C_CN97529   | Oil     | Russia                   |
| O_TUR_U_CN101331  | Oil     | Turkey                   |
| O_UKR_C_CN30860   | Oil     | Ukraine                  |
| O_UNK_C_CN100547  | Oil     | Unknown                  |
| O_UNK_C_CN30861   | Oil     | Unknown                  |
| O_URY_C_CN98100   | Oil     | Uruguay                  |
| O_USA_B_CN98566   | Oil     | United States of America |
| O_USA_C_CN18994   | Oil     | United States of America |
| O_USA_C_CN33399   | Oil     | United States of America |
| O_USA_C_CN33400   | Oil     | United States of America |
| O_USA_C_CN33992   | Oil     | United States of America |
| O_USA_C_CN97377   | Oil     | United States of America |
| O_USA_C_CN97396   | Oil     | United States of America |
| O_USA_C_CN97463   | Oil     | United States of America |
| O_USA_C_CN97642   | Oil     | United States of America |
| O_USA_C_CN97718   | Oil     | United States of America |
| O_USA_C_CN98542   | Oil     | United States of America |
| U_ETH_L_CN100895B | Unknown | Ethiopia                 |
| U_MAR_C_CN98193   | Unknown | Morocco                  |
| U_NZL_B_CN100797B | Unknown | New Zealand              |
| U_ROM_C_CN100678  | Unknown | Romania                  |
| U_RUS_L_CN97483   | Unknown | Russia                   |
| U_TUR_U_CN100828  | Unknown | Turkey                   |
| U_USA_B_CN97406   | Unknown | United States of America |
| U_USA_B_CN98644   | Unknown | United States of America |
| U_USA_C_CN97397   | Unknown | United States of America |

C = Cultivar, B = Breeding line, L= Landrace, U = Unknown improvement status. CN = Canadian number at Plant Gene Resources of Canada (PGRC)

**Table S2.** Restricted maximum likelihood analysis (REML) of root and shoot traits in the flax panel

| Trait               | Treatment Wald statistic | Genotype Wald statistic | Treatment x Genotype Wald statistic |
|---------------------|--------------------------|-------------------------|-------------------------------------|
| Total root length   | < 0.001                  | < 0.001                 | 0.606                               |
| Total root volume   | < 0.001                  | < 0.001                 | 0.581                               |
| Number of root tips | < 0.001                  | < 0.001                 | 0.106                               |
| Plant dry weight    | < 0.001                  | < 0.001                 | 0.453                               |
| Shoot dry weight    | < 0.001                  | < 0.001                 | < 0.001                             |
| Root dry weight     | 0.526                    | < 0.001                 | 0.340                               |
| Root / shoot        | < 0.001                  | < 0.001                 | 0.926                               |

Total root length (cm), Total root volume (cm<sup>3</sup>), Number of root tips, Plant dry weight (mg), Shoot dry weight (mg), Root dry weight (mg), Root / shoot (%)

**Table S3.** List of 359 NUE-related QTL identified by multi-locus GWAS methods and the differentially expressed candidate genes located within  $\pm 100$  kb of the tag QTNs

| Tag QTN      | Chr/Pos    | Trait                             | Method*    | -Log <sub>10</sub> (P) range | MAF   | R <sup>2</sup> (%) | Genotype | DEG                                          |
|--------------|------------|-----------------------------------|------------|------------------------------|-------|--------------------|----------|----------------------------------------------|
| Lu1_183477   | 1/183477   | R/S_N-                            | 1, 4       | 7.96 – 8.05                  | 0.150 | 4.99               | AA       | -                                            |
| Lu1_502406   | 1/502406   | R/S_N-                            | 3          | 4.71                         | 0.305 | 0.68               | AA       | -                                            |
| Lu1_1839328  | 1/1839328  | TRL_Index                         | 1          | 6.92                         | 0.169 | 5.27               | GG       | -                                            |
| Lu1_3301944  | 1/3301944  | TRL_N-                            | 1          | 3.92                         | 0.256 | 6.01               | AA       | <i>Lus10042369</i>                           |
| Lu1_3381304  | 1/3381304  | RV_N+                             | 2          | 7.30                         | 0.480 | 0.44               | TT       | -                                            |
| Lu1_3815901  | 1/3815901  | RV_N-                             | 6          | 7.18                         | 0.337 | 0.83               | AA       | -                                            |
| Lu1_3872648  | 1/3872648  | NUE_STI                           | 4          | 7.33                         | 0.171 | 0.49               | GG       | -                                            |
| Lu1_4123820  | 1/4123820  | R/S_N+                            | 2          | 16.41                        | 0.094 | 0.49               | AA       | <i>Lus10008643</i>                           |
| Lu1_4360783  | 1/4360783  | RV_N+, RV_N-                      | 2, 6       | 4.79 – 74.74                 | 0.207 | 2.39               | CC       | -                                            |
| Lu1_4538185  | 1/4538185  | RV_N+                             | 2          | 16.62 – 42.86                | 0.256 | 1.01               | AA       | -                                            |
| Lu1_4965387  | 1/4965387  | RV_N+                             | 2          | 55.03                        | 0.484 | 0.04               | CC       | <i>Lus10002807, Lus10002834, Lus10012064</i> |
| Lu1_5242415  | 1/5242415  | RV_N+, RT_N-                      | 1, 2       | 3.78 – 63.01                 | 0.153 | 5.81               | GG       | <i>Lus10012002, Lus10012035</i>              |
| Lu1_5660224  | 1/5660224  | RV_Index                          | 1, 2, 6    | 4.34 – 5.74                  | 0.126 | 4.19               | CC       | <i>Lus10012546</i>                           |
| Lu1_5688683  | 1/5688683  | TRL_N+, PDW_N+                    | 1, 2       | 5.43 – 8.51                  | 0.142 | 9.55               | GG       | -                                            |
| Lu1_6326887  | 1/6326887  | R/S_N+                            | 2          | 8.84                         | 0.073 | 0.23               | CC       | <i>Lus10034310, Lus10034298</i>              |
| Lu1_6744808  | 1/6744808  | R/S_N+, TRL_N+,<br>RV_N+          | 1, 2       | 4.35 – 33.92                 | 0.223 | 8.10               | AA       | -                                            |
| Lu1_9592260  | 1/9592260  | RV_N+                             | 2          | 31.03                        | 0.272 | 0.83               | CC       | <i>Lus10004226</i>                           |
| Lu1_9831112  | 1/9831112  | TRL_Index                         | 1          | 6.92                         | 0.174 | 8.68               | AA       | <i>Lus10022748, Lus10022736</i>              |
| Lu1_10175480 | 1/10175480 | SDW_N-, PDW_N-,<br>SDW_N+, TRL_N+ | 1, 2, 3, 6 | 4.41–10.20                   | 0.431 | 5.24               | TT       | <i>Lus10022675</i>                           |
| Lu1_12954522 | 1/12954522 | RT_N+                             | 2          | 4.84                         | 0.386 | 4.62               | AA       | <i>Lus10005204</i>                           |
| Lu1_16899889 | 1/16899889 | RT_Index                          | 3          | 4.45                         | 0.382 | 9.46               | CC       | -                                            |
| Lu1_17639403 | 1/17639403 | RV_N-                             | 1, 2, 3    | 4.38 – 8.32                  | 0.260 | 6.30               | AA       | -                                            |
| Lu1_17958777 | 1/17958777 | RV_N+, NUE+                       | 1, 2, 6    | 6.11 – 42.47                 | 0.333 | 6.32               | AA       | -                                            |
| Lu1_18006936 | 1/18006936 | TRL_N-, RV_N-                     | 1, 2, 4, 6 | 3.92 – 6.11                  | 0.289 | 4.14               | CC       | -                                            |
| Lu1_18475694 | 1/18475694 | NUE_Index                         | 4          | 4.29                         | 0.138 | 1.81               | GG       | -                                            |
| Lu1_19247653 | 1/19247653 | SDW_N+                            | 6          | 3.75                         | 0.289 | 0.99               | AA       | -                                            |
| Lu1_19536167 | 1/19536167 | R/S_N-                            | 6          | 5.29                         | 0.447 | 0.37               | CC       | -                                            |
| Lu1_19572730 | 1/19572730 | RV_N+                             | 2          | 22.98                        | 0.313 | 1.87               | GG       | -                                            |
| Lu1_19697968 | 1/19697968 | RT_Index                          | 4          | 6.64                         | 0.094 | 5.04               | GG       | -                                            |
| Lu1_20419533 | 1/20419533 | RT_N-                             | 2          | 5.42                         | 0.252 | 3.26               | GG       | -                                            |
| Lu1_20935186 | 1/20935186 | NUE_Index                         | 2, 4       | 5.14 – 6.27                  | 0.098 | 2.86               | TT       | -                                            |
| Lu1_22850090 | 1/22850090 | PDW_N+                            | 6          | 4.92                         | 0.098 | 0.84               | GG       | -                                            |
| Lu1_25965118 | 1/25965118 | RT_Index                          | 2, 6       | 4.72 – 5.28                  | 0.163 | 3.91               | AA       | <i>Lus10006547, Lus10006552, Lus10006563</i> |
| Lu1_27500392 | 1/27500392 | NUE_STI, RT_Index                 | 1, 2, 4, 6 | 3.96 – 5.60                  | 0.187 | 6.00               | AA       | -                                            |



|              |            |                                      |            |               |       |       |    |                                              |
|--------------|------------|--------------------------------------|------------|---------------|-------|-------|----|----------------------------------------------|
| Lu1_27734323 | 1/27734323 | R/S_N-, R/S_N+                       | 6          | 3.98 – 4.73   | 0.264 | 2.03  | CC | -                                            |
| Lu1_28257219 | 1/28257219 | PDW_N+                               | 3,6        | 4.30 – 5.37   | 0.215 | 3.96  | TT | -                                            |
| Lu1_28369667 | 1/28369667 | NUE+                                 | 4          | 6.79          | 0.407 | 6.74  | CC | <i>Lus10018926</i>                           |
| Lu1_28527080 | 1/28527080 | R/S_N+                               | 4          | 4.01          | 0.207 | 1.25  | TT | <i>Lus10000771</i>                           |
| Lu1_28827671 | 1/28827671 | RT_N+                                | 6          | 5.43          | 0.122 | 1.93  | AA | <i>Lus10006075</i>                           |
| Lu1_28921963 | 1/28921963 | RT_N-, NUE-                          | 1, 2, 6    | 4.46 – 8.19   | 0.094 | 12.80 | GG | -                                            |
| Lu2_783617   | 2/783617   | TRL_N-, NUE-                         | 1, 4       | 3.83 – 6.56   | 0.087 | 11.78 | AA | <i>Lus10019256</i>                           |
| Lu2_1311870  | 2/1311870  | R/S_N-                               | 2, 4       | 4.26 – 12.13  | 0.191 | 5.28  | AA | -                                            |
| Lu2_2232215  | 2/2232215  | R/S_N-, R/S_N+                       | 2, 3       | 7.49 – 9.32   | 0.313 | 1.41  | AA | <i>Lus10016358, Lus10016353</i>              |
| Lu2_2368527  | 2/2368527  | R/S_N+                               | 2          | 14.58 – 25.10 | 0.114 | 0.85  | GG | <i>Lus10016331</i>                           |
| Lu2_2727588  | 2/2727588  | R/S_N-                               | 3          | 6.93          | 0.423 | 3.18  | CC | <i>Lus10002324</i>                           |
| Lu2_3069270  | 2/3069270  | R/S_N-                               | 4          | 6.44          | 0.211 | 11.79 | GG | <i>Lus10014352, Lus10014340</i>              |
| Lu2_3641485  | 2/3641485  | RV_N+                                | 2          | 45.50         | 0.215 | 0.28  | TT | <i>Lus10003439</i>                           |
| Lu2_4053688  | 2/4053688  | TRL_Index,<br>NUE_Index              | 1, 2, 4    | 4.15 – 8.55   | 0.065 | 4.88  | CC | -                                            |
| Lu2_4220131  | 2/4220131  | TRL_Index,<br>RT_Index               | 4, 6       | 4.06 – 7.48   | 0.203 | 7.01  | AA | <i>Lus10020193, Lus10020174, Lus10020181</i> |
| Lu2_4461069  | 2/4461069  | PDW_N-, RV_N-,<br>TRL_N-             | 1, 2, 3, 6 | 5.71 – 12.59  | 0.488 | 9.09  | CC | -                                            |
| Lu2_5142092  | 2/5142092  | SDW_Index                            | 1          | 3.73          | 0.149 | 9.5   | GG | -                                            |
| Lu2_5901183  | 2/5901183  | RV_N-, RT_N-                         | 3, 4       | 4.43 – 6.03   | 0.309 | 4.40  | GG | -                                            |
| Lu2_5928955  | 2/5928955  | NUE+                                 | 3, 4       | 5.10 – 8.00   | 0.459 | 8.59  | AA | -                                            |
| Lu2_6861078  | 2/6861078  | RV_N+                                | 2          | 41.15         | 0.167 | 2.23  | TT | -                                            |
| Lu2_6903912  | 2/6903912  | RT_N+                                | 2          | 5.16          | 0.126 | 4.56  | TT | -                                            |
| Lu2_7470418  | 2/7470418  | SDW_N+                               | 6          | 5.84          | 0.089 | 1.93  | CC | -                                            |
| Lu2_7575890  | 2/7575890  | PDW_N-                               | 6          | 4.64          | 0.187 | 1.62  | GG | -                                            |
| Lu2_9463028  | 2/9463028  | RT_Index                             | 1, 2, 4, 6 | 3.72 – 9.96   | 0.065 | 7.53  | GG | -                                            |
| Lu2_19111900 | 2/19111900 | SDW_Index,<br>PDW_Index,<br>RV_Index | 2, 4, 6    | 3.85 – 8.91   | 0.163 | 7.50  | TT | <i>Lus10021827</i>                           |
| Lu2_19272779 | 2/19272779 | NUE_Index                            | 2          | 4.31          | 0.085 | 0.02  | GG | -                                            |
| Lu2_19401332 | 2/19401332 | SDW_N-, PDW_N-,<br>R/S_N-            | 2, 4, 6    | 4.31 – 10.52  | 0.102 | 4.78  | GG | -                                            |
| Lu2_19451785 | 2/19451785 | R/S_N+                               | 2          | 14.09         | 0.094 | 0.86  | CC | -                                            |
| Lu2_21668160 | 2/21668160 | PDW_N+,<br>NUE_Index                 | 2, 4       | 4.98 – 9.03   | 0.130 | 7.51  | TT | <i>Lus10035126</i>                           |
| Lu2_21694722 | 2/21694722 | R/S_N-, R/S_N+                       | 2, 6       | 5.14 – 5.63   | 0.155 | 2.53  | CC | -                                            |

|              |            |                              |      |               |       |       |    |                                 |
|--------------|------------|------------------------------|------|---------------|-------|-------|----|---------------------------------|
| Lu2_21834746 | 2/21834746 | SDW_N+, PDW_N+,<br>NUE_Index | 4, 6 | 4.85 – 5.56   | 0.138 | 12.43 | TT | <i>Lus10035175</i>              |
| Lu2_21943322 | 2/21943322 | R/S_N+, NUE_STI              | 2    | 5.54 – 14.08  | 0.094 | 3.86  | AA | -                               |
| Lu2_22168558 | 2/22168558 | NUE_Index, R/S_N+            | 2    | 5.88 – 32.08  | 0.081 | 0.93  | GG | -                               |
| Lu2_22306950 | 2/22306950 | NUE+                         | 1, 6 | 4.46 – 6.80   | 0.225 | 5.95  | GG | -                               |
| Lu2_23979210 | 2/23979210 | NUE_Index                    | 6    | 4.24          | 0.106 | 0.02  | GG | <i>Lus10030589</i>              |
| Lu3_964017   | 3/964017   | RV_Index                     | 1    | 4.02          | 0.116 | 14.54 | GG | <i>Lus10021939</i>              |
| Lu3_1295318  | 3/1295318  | RT_Index                     | 2    | 7.41          | 0.065 | 8.00  | CC | <i>Lus10037389</i>              |
| Lu3_1536734  | 3/1536734  | RV_N-                        | 6    | 4.22          | 0.240 | 0.88  | GG | -                               |
| Lu3_1823319  | 3/1823319  | R/S_N+                       | 2, 6 | 5.56 – 51.71  | 0.297 | 3.29  | TT | -                               |
| Lu3_2936603  | 3/2936603  | RT_N+                        | 6    | 6.09          | 0.089 | 3.20  | AA | -                               |
| Lu3_3532734  | 3/3532734  | NUE_STI                      | 2    | 7.67          | 0.130 | 7.33  | CC | <i>Lus10019190, Lus10000642</i> |
| Lu3_5585030  | 3/5585030  | RT_Index                     | 2, 4 | 4.05 – 4.19   | 0.431 | 2.81  | AA | -                               |
| Lu3_6931619  | 3/6931619  | RV_Index                     | 4    | 4.59          | 0.472 | 5.77  | AA | <i>Lus10040821</i>              |
| Lu3_8280597  | 3/8280597  | TRL_Index, RV_N+             | 2    | 5.13 – 25.40  | 0.155 | 5.41  | GG | <i>Lus10001885</i>              |
| Lu3_14389194 | 3/14389194 | R/S_N+                       | 2    | 16.74         | 0.069 | 2.20  | GG | -                               |
| Lu3_16915609 | 3/16915609 | SDW_N+, PDW_N+               | 2    | 3.79 – 8.43   | 0.106 | 5.25  | GG | -                               |
| Lu3_17130944 | 3/17130944 | SDW_N+                       | 6    | 4.42          | 0.248 | 1.41  | CC | -                               |
| Lu3_19038225 | 3/19038225 | R/S_N+                       | 2    | 35.85         | 0.106 | 0.53  | GG | -                               |
| Lu3_19482873 | 3/19482873 | RT_N-                        | 6    | 3.81          | 0.309 | 1.80  | CC | -                               |
| Lu3_20904140 | 3/20904140 | RV_N+                        | 2    | 19.81 – 37.25 | 0.195 | 0.91  | CC | -                               |
| Lu3_21020734 | 3/21020734 | NUE-, NUE_STI                | 1, 2 | 3.74 – 4.88   | 0.168 | 7.78  | CC | -                               |
| Lu3_22332646 | 3/22332646 | SDW_N-, PDW_N-               | 6    | 3.79 – 6.62   | 0.150 | 1.74  | TT | -                               |
| Lu3_25055317 | 3/25055317 | R/S_N+                       | 2    | 17.59         | 0.094 | 1.81  | TT | <i>Lus10037644</i>              |
| Lu4_158148   | 4/158148   | RV_N+                        | 2    | 45.48         | 0.366 | 0.20  | GG | -                               |
| Lu4_387643   | 4/387643   | NUE_Index                    | 2    | 5.88          | 0.220 | 2.58  | AA | -                               |
| Lu4_434920   | 4/434920   | RV_N+                        | 2    | 28.62         | 0.106 | 0.57  | CC | -                               |
| Lu4_893602   | 4/893602   | RT_N-                        | 6    | 6.34          | 0.333 | 6.18  | AA | -                               |
| Lu4_1182364  | 4/1182364  | NUE+                         | 6    | 6.00          | 0.126 | 2.10  | AA | -                               |
| Lu4_2006452  | 4/2006452  | NUE+, RV_Index               | 4, 6 | 4.47 – 6.84   | 0.488 | 3.83  | TT | <i>Lus10009847</i>              |
| Lu4_2103588  | 4/2103588  | TRL_Index                    | 2, 6 | 4.22 – 4.72   | 0.447 | 3.89  | CC | -                               |
| Lu4_8268087  | 4/8268087  | SDW_N-                       | 1    | 4.00          | 0.157 | 3.93  | GG | <i>Lus10039504</i>              |
| Lu4_8780339  | 4/8780339  | SDW_N-                       | 1    | 4.89          | 0.062 | 6.98  | AA | <i>Lus10029002</i>              |
| Lu4_11529805 | 4/11529805 | TRL_N+, RV_N+                | 2, 4 | 5.67 – 16.73  | 0.240 | 2.08  | AA | -                               |
| Lu4_12589151 | 4/12589151 | TRL_N-                       | 1    | 3.81          | 0.141 | 11.19 | CC | <i>Lus10036941</i>              |
| Lu4_12792147 | 4/12792147 | RV_N+                        | 2    | 49.09 – 49.63 | 0.126 | 1.61  | TT | <i>Lus10036965</i>              |
| Lu4_13634659 | 4/13634659 | RV_N+, SDW_N-                | 2, 6 | 3.91 – 42.51  | 0.252 | 3.29  | TT | <i>Lus10034407</i>              |

|              |            |                                 |            |               |       |       |    |                                                                        |
|--------------|------------|---------------------------------|------------|---------------|-------|-------|----|------------------------------------------------------------------------|
| Lu4_14298191 | 4/14298191 | R/S_N-                          | 3          | 6.08          | 0.228 | 1.31  | CC | <i>Lus10041444, Lus10041466, Lus10041461, Lus10041473, Lus10041460</i> |
| Lu4_14523601 | 4/14523601 | RV_N+                           | 2          | 56.83 – 76.15 | 0.114 | 0.69  | AA | <i>Lus10041489, Lus10041487</i>                                        |
| Lu4_14642224 | 4/14642224 | RV_N+                           | 2          | 52.45         | 0.073 | 0.11  | CC | <i>Lus10041543, Lus10041526</i>                                        |
| Lu4_14879748 | 4/14879748 | R/S_N-                          | 4          | 3.79          | 0.175 | 5.99  | TT | -                                                                      |
| Lu4_15074000 | 4/15074000 | RV_N+                           | 2          | 52.10         | 0.281 | 0.11  | CC | <i>Lus10041628, Lus10041614, Lus10041616, Lus10041622</i>              |
| Lu4_15303541 | 4/15303541 | NUE_STI                         | 2          | 6.69          | 0.155 | 4.94  | CC | <i>Lus10041664</i>                                                     |
| Lu4_16158145 | 4/16158145 | RV_N-                           | 6          | 6.00          | 0.195 | 1.23  | AA | <i>Lus10041830, Lus10041843</i>                                        |
| Lu4_17131980 | 4/17131980 | RT_N+, SDW_N-, PDW_N-           | 1, 2, 6    | 6.52 – 8.01   | 0.293 | 12.24 | GG | -                                                                      |
| Lu4_17401223 | 4/17401223 | RV_N-                           | 6          | 7.74          | 0.236 | 0.39  | CC | -                                                                      |
| Lu4_17463420 | 4/17463420 | RV_N-                           | 6          | 12.10         | 0.240 | 0.66  | GG | <i>Lus10020728</i>                                                     |
| Lu4_17943761 | 4/17943761 | R/S_N-                          | 6          | 4.90          | 0.073 | 1.92  | CC | <i>Lus10020658</i>                                                     |
| Lu4_18720426 | 4/18720426 | RV_N-                           | 6          | 4.63          | 0.366 | 0.15  | TT | <i>Lus10027185, Lus10027172, Lus10030042, Lus10030044</i>              |
| Lu4_19049038 | 4/19049038 | R/S_N+                          | 2          | 4.82          | 0.106 | 0.80  | AA | <i>Lus10039710, Lus10039725, Lus10039732</i>                           |
| Lu5_88517    | 5/88517    | SDW_Index, PDW_Index            | 1, 2, 4, 6 | 3.95 – 12.27  | 0.431 | 9.38  | GG | -                                                                      |
| Lu5_2098651  | 5/2098651  | RV_Index                        | 1          | 9.38          | 0.265 | 14.40 | AA | -                                                                      |
| Lu5_2166168  | 5/2166168  | NUE_Index                       | 2          | 5.49          | 0.301 | 0.10  | TT | -                                                                      |
| Lu5_2260383  | 5/2260383  | TRL_Index                       | 1          | 5.71          | 0.310 | 7.99  | TT | -                                                                      |
| Lu5_2951268  | 5/2951268  | TRL_N+, RV_N+, RV_N-, PDW_Index | 1, 2, 4, 6 | 5.41 – 13.42  | 0.199 | 8.48  | CC | <i>Lus10032303, Lus10032316</i>                                        |
| Lu5_3595413  | 5/3595413  | R/S_N-, NUE_Index, R/S_N+       | 2, 3, 6    | 4.90 – 29.83  | 0.472 | 0.53  | CC | <i>Lus10032421, Lus10033226, Lus10033223</i>                           |
| Lu5_4220146  | 5/4220146  | PDW_N+                          | 6          | 4.60          | 0.065 | 0.83  | AA | -                                                                      |
| Lu5_4528185  | 5/4528185  | NUE+                            | 4          | 4.72          | 0.382 | 3.58  | CC | <i>Lus10034779</i>                                                     |
| Lu5_4628966  | 5/4628966  | R/S_N+                          | 2          | 24.23         | 0.476 | 0.41  | CC | -                                                                      |
| Lu5_6218765  | 5/6218765  | NUE+                            | 1          | 5.81          | 0.248 | 12.34 | AA | -                                                                      |
| Lu5_8169998  | 5/8169998  | R/S_N+                          | 2          | 6.60 – 24.22  | 0.061 | 0.42  | GG | -                                                                      |
| Lu5_9381335  | 5/9381335  | PDW_Index                       | 2          | 3.94          | 0.069 | 1.82  | AA | -                                                                      |
| Lu5_11945444 | 5/11945444 | RV_N+, RV_Index                 | 2, 3       | 3.96 – 6.79   | 0.106 | 4.97  | AA | <i>Lus10035293, Lus10035284, Lus10035289</i>                           |
| Lu5_12191977 | 5/12191977 | SDW_N-, PDW_N-                  | 1          | 4.23 – 6.36   | 0.331 | 8.86  | CC | -                                                                      |
| Lu5_14527440 | 5/14527440 | NUE_Index                       | 2, 6       | 5.14 – 8.15   | 0.089 | 5.32  | GG | <i>Lus10028453, Lus10028463</i>                                        |
| Lu5_16368000 | 5/16368000 | RT_N-, RV_N+                    | 2, 6       | 4.21 – 24.53  | 0.211 | 5.59  | AA | -                                                                      |
| Lu5_16695813 | 5/16695813 | RV_Index                        | 2          | 7.73          | 0.305 | 7.35  | CC | <i>Lus10039666</i>                                                     |
| Lu5_17289922 | 5/17289922 | TRL_N+                          | 6          | 4.43          | 0.439 | 2.21  | CC | <i>Lus10018533, Lus10018530, Lus10018532</i>                           |

|              |            |                                   |         |              |       |       |    |                                                               |
|--------------|------------|-----------------------------------|---------|--------------|-------|-------|----|---------------------------------------------------------------|
| Lu6_252613   | 6/252613   | RV_N+                             | 2       | 32.30        | 0.325 | 0.21  | CC | -                                                             |
| Lu6_269306   | 6/269306   | RV_N-, TRL_N-,<br>TRL_Index       | 2, 4, 6 | 4.18 – 7.28  | 0.228 | 3.89  | GG | <i>Lus10010943, Lus10010940, Lus10010930,<br/>Lus10010927</i> |
| Lu6_1634298  | 6/1634298  | TRL_N-                            | 4       | 5.34         | 0.163 | 3.72  | TT | <i>Lus10017723</i>                                            |
| Lu6_3262361  | 6/3262361  | RV_N-                             | 6       | 5.25         | 0.089 | 0.89  | AA | <i>Lus10019494, Lus10019463, Lus10019490</i>                  |
| Lu6_4289550  | 6/4289550  | SDW_N-, PDW_N-                    | 1       | 4.14 – 5.96  | 0.438 | 11.88 | GG | -                                                             |
| Lu6_4400099  | 6/4400099  | RV_N+                             | 2       | 43.14        | 0.260 | 0.82  | CC | -                                                             |
| Lu6_4642295  | 6/4642295  | RV_N+                             | 2       | 8.52         | 0.142 | 1.06  | GG | -                                                             |
| Lu6_5225959  | 6/5225959  | R/S_N+                            | 2       | 20.28        | 0.130 | 0.94  | TT | -                                                             |
| Lu6_5700373  | 6/5700373  | SDW_N-, PDW_N-,<br>SDW_N+, PDW_N+ | 2, 6    | 4.91 – 10.89 | 0.081 | 5.55  | AA | -                                                             |
| Lu6_5719475  | 6/5719475  | SDW_N-                            | 4       | 4.40         | 0.073 | 16.92 | AA | -                                                             |
| Lu6_9232719  | 6/9232719  | RV_N-                             | 6       | 10.88        | 0.447 | 0.79  | GG | -                                                             |
| Lu6_12083087 | 6/12083087 | R/S_N-, NUE_STI,<br>NUE+          | 2, 4, 6 | 4.33 – 5.12  | 0.309 | 4.54  | AA | -                                                             |
| Lu6_12435808 | 6/12435808 | R/S_N+                            | 2       | 13.23        | 0.146 | 0.69  | AA | <i>Lus10016062</i>                                            |
| Lu6_13245642 | 6/13245642 | R/S_N+, NUE_Index                 | 2       | 4.03 – 4.87  | 0.106 | 1.75  | TT | <i>Lus10013841, Lus10013827</i>                               |
| Lu6_13654293 | 6/13654293 | R/S_N+                            | 2       | 15.37        | 0.073 | 0.68  | GG | -                                                             |
| Lu6_15405962 | 6/15405962 | NUE_Index                         | 2, 4    | 4.06 – 8.51  | 0.155 | 3.03  | AA | <i>Lus10021019, Lus10021010</i>                               |
| Lu6_16074953 | 6/16074953 | RT_N+                             | 4, 6    | 5.13 – 8.56  | 0.220 | 5.08  | GG | -                                                             |
| Lu6_16240613 | 6/16240613 | R/S_N-                            | 2       | 5.55         | 0.248 | 1.73  | CC | -                                                             |
| Lu6_16828246 | 6/16828246 | PDW_Index, R/S_N+                 | 1, 2    | 4.85 – 5.22  | 0.372 | 13.01 | AA | <i>Lus10025252, Lus10025265, Lus10025269,<br/>Lus10024438</i> |
| Lu6_17122009 | 6/17122009 | TRL_Index                         | 6       | 4.95         | 0.187 | 5.35  | TT | -                                                             |
| Lu6_17318908 | 6/17318908 | SDW_Index, R/S_N+                 | 1, 2    | 3.75 – 38.37 | 0.079 | 11.60 | CC | <i>Lus10024367</i>                                            |
| Lu6_17695007 | 6/17695007 | R/S_N+, NUE+                      | 2, 6    | 4.00 – 6.29  | 0.394 | 6.81  | GG | <i>Lus10024314, Lus10024306</i>                               |
| Lu7_406563   | 7/406563   | RV_N+                             | 2       | 10.10        | 0.443 | 0.13  | GG | <i>Lus10017362, Lus10017372</i>                               |
| Lu7_1606466  | 7/1606466  | R/S_N+                            | 2       | 37.60        | 0.215 | 0.49  | GG | <i>Lus10028791</i>                                            |
| Lu7_2612672  | 7/2612672  | RT_N+                             | 4       | 5.61         | 0.281 | 3.85  | AA | -                                                             |
| Lu7_3162503  | 7/3162503  | R/S_N+                            | 2, 6    | 7.08 – 21.96 | 0.114 | 2.78  | GG | <i>Lus10023525</i>                                            |
| Lu7_4527136  | 7/4527136  | TRL_Index                         | 3       | 5.96         | 0.195 | 10.66 | GG | <i>Lus10040179</i>                                            |
| Lu7_4646757  | 7/4646757  | R/S_N-                            | 3       | 5.04         | 0.439 | 0.93  | CC | <i>Lus10040134</i>                                            |
| Lu7_4861539  | 7/4861539  | TRL_Index                         | 2       | 5.00         | 0.407 | 5.93  | GG | -                                                             |
| Lu7_7173159  | 7/7173159  | TRL_Index,<br>RV_Index            | 2, 4, 6 | 4.19 – 9.44  | 0.102 | 8.76  | CC | <i>Lus10024457</i>                                            |
| Lu7_9137683  | 7/9137683  | RV_Index                          | 2, 6    | 4.25 – 8.63  | 0.163 | 6.88  | CC | -                                                             |
| Lu7_9194656  | 7/9194656  | RV_Index                          | 4       | 5.43         | 0.191 | 7.01  | GG | -                                                             |
| Lu7_15677858 | 7/15677858 | TRL_Index                         | 2       | 4.21         | 0.236 | 1.72  | GG | -                                                             |

|              |            |                                 |            |              |       |       |    |                                                                    |
|--------------|------------|---------------------------------|------------|--------------|-------|-------|----|--------------------------------------------------------------------|
| Lu7_17139409 | 7/17139409 | RV_N+                           | 2          | 25.10        | 0.089 | 0.41  | TT | -                                                                  |
| Lu7_17880184 | 7/17880184 | R/S_N-, TRL_N+                  | 1, 2, 4, 6 | 4.64 – 7.85  | 0.471 | 17.12 | AA | Lus10005429                                                        |
| Lu7_18116505 | 7/18116505 | TRL_Index, R/S_N+               | 2          | 7.91 – 11.73 | 0.110 | 5.59  | TT | -                                                                  |
| Lu8_5060402  | 8/5060402  | TRL_Index                       | 2, 3       | 5.99 – 7.16  | 0.293 | 10.15 | CC | Lus10023890                                                        |
| Lu8_6944451  | 8/6944451  | TRL_N+, RV_N+,<br>R/S_N+        | 2, 4       | 6.32 – 72.75 | 0.069 | 2.38  | GG | -                                                                  |
| Lu8_10951919 | 8/10951919 | NUE-                            | 6          | 4.70         | 0.187 | 7.72  | CC | -                                                                  |
| Lu8_14874163 | 8/14874163 | PDW_Index                       | 1          | 4.44         | 0.219 | 2.54  | GG | -                                                                  |
| Lu8_15171521 | 8/15171521 | RV_N+                           | 2          | 16.65        | 0.114 | 0.11  | TT | -                                                                  |
| Lu8_15393736 | 8/15393736 | R/S_N+                          | 2          | 7.51         | 0.065 | 0.46  | CC | -                                                                  |
| Lu8_17493700 | 8/17493700 | SDW_N+                          | 2          | 3.84         | 0.134 | 2.88  | GG | Lus10000482                                                        |
| Lu8_17748850 | 8/17748850 | RV_N+, TRL_N+                   | 2, 4       | 4.60 – 61.66 | 0.333 | 2.71  | CC | -                                                                  |
| Lu8_19503719 | 8/19503719 | RV_Index                        | 2          | 6.70         | 0.191 | 6.60  | TT | Lus10007043                                                        |
| Lu8_19661867 | 8/19661867 | RT_N-, RT_N+                    | 2, 4       | 5.35 – 5.85  | 0.175 | 4.56  | TT | Lus10014133, Lus10007006                                           |
| Lu8_19903484 | 8/19903484 | TRL_Index,<br>RT_Index          | 4, 6       | 4.76 – 4.82  | 0.342 | 3.30  | AA | Lus10024559, Lus10024583, Lus10024565,<br>Lus10024571, Lus10024600 |
| Lu8_20178792 | 8/20178792 | R/S_N+                          | 2          | 40.43        | 0.069 | 1.26  | AA | -                                                                  |
| Lu8_20265310 | 8/20265310 | RT_N-                           | 4          | 5.86         | 0.333 | 5.78  | AA | -                                                                  |
| Lu8_21114435 | 8/21114435 | RV_Index                        | 3          | 4.05         | 0.130 | 5.61  | CC | Lus10033988                                                        |
| Lu8_21427977 | 8/21427977 | R/S_N-                          | 3          | 5.99         | 0.228 | 4.15  | AA | Lus10034042, Lus10010506                                           |
| Lu8_21833452 | 8/21833452 | R/S_N+                          | 2          | 3.81         | 0.390 | 0.83  | TT | Lus10010568, Lus10010569                                           |
| Lu8_22089609 | 8/22089609 | TRL_N+                          | 2, 3       | 3.98 – 4.32  | 0.394 | 3.04  | CC | -                                                                  |
| Lu8_22317870 | 8/22317870 | NUE-, RV_Index                  | 1, 2       | 4.56 – 4.71  | 0.141 | 6.40  | CC | Lus10039470, Lus10039488                                           |
| Lu8_22556260 | 8/22556260 | RV_N+, PDW_Index                | 2, 4       | 3.96 – 9.22  | 0.179 | 3.82  | AA | Lus10015339, Lus10015360                                           |
| Lu8_23500395 | 8/23500395 | RV_N-, RT_Index                 | 6          | 5.75 – 6.52  | 0.163 | 8.45  | CC | Lus10018410                                                        |
| Lu9_753524   | 9/753524   | NUE_Index                       | 1          | 3.98         | 0.079 | 3.93  | CC | Lus10010187, Lus10010177                                           |
| Lu9_887727   | 9/887727   | NUE_Index                       | 2          | 3.85         | 0.085 | 0.07  | TT | -                                                                  |
| Lu9_1119973  | 9/1119973  | R/S_N+, SDW_Index,<br>PDW_Index | 2, 6       | 4.36 – 38.70 | 0.374 | 3.45  | TT | Lus10007530, Lus10028970                                           |
| Lu9_1477322  | 9/1477322  | R/S_N-                          | 3          | 10.46        | 0.297 | 1.90  | CC | Lus10004338                                                        |
| Lu9_1777951  | 9/1777951  | TRL_Index                       | 2          | 10.16        | 0.256 | 9.63  | AA | Lus10008972                                                        |
| Lu9_3897458  | 9/3897458  | TRL_N+                          | 1          | 4.26         | 0.083 | 2.09  | TT | -                                                                  |
| Lu9_3959435  | 9/3959435  | TRL_N+, RT_N+                   | 1, 2       | 4.06 – 6.87  | 0.397 | 10.32 | GG | -                                                                  |
| Lu9_4142327  | 9/4142327  | RV_N+                           | 2          | 18.11        | 0.215 | 1.39  | TT | Lus10040365, Lus10040377                                           |
| Lu9_4401733  | 9/4401733  | RV_N+                           | 2          | 8.93         | 0.260 | 0.37  | TT | Lus10040297, Lus10040311                                           |
| Lu9_4846565  | 9/4846565  | RV_N+                           | 2          | 23.47        | 0.061 | 0.62  | CC | Lus10028267, Lus10028251, Lus10004678                              |
| Lu9_6368499  | 9/6368499  | NUE+                            | 1, 3       | 4.51 – 4.93  | 0.459 | 16.59 | AA | Lus10031059                                                        |
| Lu9_7182110  | 9/7182110  | RV_N+                           | 2, 6       | 9.20 – 60.95 | 0.342 | 3.22  | GG | -                                                                  |



|               |             |                                |            |              |       |       |    |                                                                            |
|---------------|-------------|--------------------------------|------------|--------------|-------|-------|----|----------------------------------------------------------------------------|
| Lu9_7471774   | 9/7471774   | R/S_N-                         | 6          | 6.29         | 0.325 | 8.94  | GG | -                                                                          |
| Lu9_8326375   | 9/8326375   | NUE_Index                      | 2          | 4.28         | 0.069 | 0.02  | TT | -                                                                          |
| Lu9_8540939   | 9/8540939   | RV_N+                          | 2          | 45.44        | 0.293 | 0.25  | CC | -                                                                          |
| Lu9_9586152   | 9/9586152   | R/S_N+                         | 2          | 12.44        | 0.077 | 0.11  | AA | -                                                                          |
| Lu9_17066425  | 9/17066425  | RV_N-                          | 6          | 11.71        | 0.183 | 0.30  | GG | -                                                                          |
| Lu9_17166466  | 9/17166466  | NUE_STI, R/S_N+                | 4, 6       | 4.24 – 5.91  | 0.130 | 5.99  | GG | <i>Lus10022030</i>                                                         |
| Lu9_17473027  | 9/17473027  | RV_N+, RT_N+                   | 1, 4       | 3.87 – 5.98  | 0.115 | 6.94  | GG | -                                                                          |
| Lu9_17900887  | 9/17900887  | R/S_N+                         | 2          | 5.15         | 0.374 | 1.34  | TT | -                                                                          |
| Lu9_18443162  | 9/18443162  | RV_Index                       | 2          | 3.76         | 0.130 | 1.40  | GG | <i>Lus10029683</i>                                                         |
| Lu9_19177190  | 9/19177190  | R/S_N+, NUE_Index              | 2, 4       | 4.75 – 4.81  | 0.199 | 9.98  | AA | <i>Lus10024873, Lus10024837</i>                                            |
| Lu9_19469655  | 9/19469655  | R/S_N-, RV_Index               | 2, 6       | 4.11 – 8.01  | 0.358 | 2.83  | CC | <i>Lus10024901, Lus10024908</i>                                            |
| Lu9_22655891  | 9/22655891  | SDW_N-                         | 6          | 4.68         | 0.081 | 1.68  | TT | -                                                                          |
| Lu10_265726   | 10/265726   | TRL_N-                         | 3          | 4.11         | 0.354 | 6.44  | TT | -                                                                          |
| Lu10_476659   | 10/476659   | RV_N-                          | 2          | 5.81         | 0.484 | 1.54  | AA | <i>Lus10009679</i>                                                         |
| Lu10_978991   | 10/978991   | SDW_Index,<br>PDW_Index        | 4          | 5.07 – 7.37  | 0.179 | 9.36  | AA | <i>Lus10031810</i>                                                         |
| Lu10_1494732  | 10/1494732  | RV_N-, RV_N+                   | 2, 6       | 4.72 – 19.10 | 0.386 | 1.08  | CC | -                                                                          |
| Lu10_1494757  | 10/1494757  | SDW_N-, PDW_N-                 | 2, 3, 4, 6 | 4.17 – 10.00 | 0.431 | 9.86  | GG | <i>Lus10031701, Lus10031713</i>                                            |
| Lu10_6500681  | 10/6500681  | R/S_N-, R/S_N+                 | 2, 4       | 3.83 – 21.45 | 0.203 | 3.73  | CC | -                                                                          |
| Lu10_10314748 | 10/10314748 | PDW_Index, RV_N-               | 2, 6       | 4.20 – 8.00  | 0.203 | 1.27  | CC | -                                                                          |
| Lu10_11093894 | 10/11093894 | RT_N+                          | 4          | 4.09         | 0.138 | 1.79  | CC | -                                                                          |
| Lu10_11578585 | 10/11578585 | NUE_Index                      | 4          | 6.38         | 0.163 | 5.29  | GG | <i>Lus10032750</i>                                                         |
| Lu10_13207100 | 10/13207100 | R/S_N+                         | 4          | 4.11         | 0.171 | 1.56  | GG | <i>Lus10001130</i>                                                         |
| Lu10_13429467 | 10/13429467 | R/S_N-                         | 3          | 5.05         | 0.468 | 1.58  | CC | <i>Lus10042679</i>                                                         |
| Lu10_14547589 | 10/14547589 | PDW_Index                      | 3          | 5.01         | 0.085 | 9.20  | CC | -                                                                          |
| Lu10_15238760 | 10/15238760 | RV_N+                          | 2          | 8.92         | 0.415 | 0.26  | GG | -                                                                          |
| Lu10_15674355 | 10/15674355 | SDW_N-, PDW_N-,<br>RT_N+, NUE+ | 1, 2, 6    | 5.03 – 8.12  | 0.314 | 10.51 | CC | <i>Lus10018711, Lus10018756, Lus10018730,<br/>Lus10018727, Lus10018752</i> |
| Lu10_15998665 | 10/15998665 | TRL_Index                      | 1          | 4.41         | 0.488 | 3.82  | TT | <i>Lus10022935, Lus10022924</i>                                            |
| Lu10_16228223 | 10/16228223 | TRL_N+                         | 2, 4, 6    | 4.41 – 7.74  | 0.191 | 6.50  | CC | -                                                                          |
| Lu10_16760337 | 10/16760337 | R/S_N+                         | 2, 4       | 5.38 – 14.97 | 0.094 | 4.01  | CC | <i>Lus10022789</i>                                                         |
| Lu10_16957730 | 10/16957730 | SDW_N+                         | 2          | 6.02         | 0.130 | 2.92  | TT | <i>Lus10002343, Lus10002355, Lus10002353,<br/>Lus10002356</i>              |
| Lu10_17822828 | 10/17822828 | RV_N-                          | 6          | 8.84         | 0.073 | 0.63  | CC | -                                                                          |
| Lu11_1454883  | 11/1454883  | RT_N-                          | 2          | 5.15         | 0.378 | 3.23  | CC | -                                                                          |
| Lu11_1841121  | 11/1841121  | NUE-, NUE+,<br>NUE_STI         | 2, 4       | 4.85 – 10.35 | 0.110 | 8.49  | TT | <i>Lus10038783, Lus10038768</i>                                            |
| Lu11_2112004  | 11/2112004  | TRL_N-, NUE_Index              | 1, 4       | 4.34 – 5.64  | 0.086 | 3.07  | GG | <i>Lus10038745</i>                                                         |

|               |             |                                           |               |               |       |       |    |                                                           |
|---------------|-------------|-------------------------------------------|---------------|---------------|-------|-------|----|-----------------------------------------------------------|
| Lu11_2354918  | 11/2354918  | SDW_Index,<br>PDW_Index, R/S_N+           | 1, 2, 4, 6    | 9.22 – 32.98  | 0.118 | 13.35 | GG | -                                                         |
| Lu11_3027697  | 11/3027697  | PDW_N-                                    | 6             | 7.56          | 0.447 | 3.11  | CC | -                                                         |
| Lu11_3158486  | 11/3158486  | PDW_N+                                    | 2, 6          | 4.01 – 4.41   | 0.382 | 1.89  | GG | -                                                         |
| Lu11_3337135  | 11/3337135  | SDW_N-, PDW_N-,<br>RT_N-, RT_N+,<br>RV_N+ | 1, 2, 4, 6    | 4.25 – 58.68  | 0.120 | 5.86  | CC | <i>Lus10001245</i>                                        |
| Lu11_3725133  | 11/3725133  | RV_Index                                  | 2, 6          | 3.86 – 5.21   | 0.110 | 3.46  | GG | -                                                         |
| Lu11_4178266  | 11/4178266  | RV_N-                                     | 6             | 4.48          | 0.065 | 2.82  | TT | <i>Lus10026400</i>                                        |
| Lu11_4239182  | 11/4239182  | TRL_N-, RV_N-,<br>RV_N+                   | 1, 2, 4, 6    | 5.63 – 16.47  | 0.228 | 10.80 | AA | -                                                         |
| Lu11_4454464  | 11/4454464  | RV_N+                                     | 2             | 20.92         | 0.496 | 0.70  | GG | -                                                         |
| Lu11_5325891  | 11/5325891  | TRL_Index,<br>RV_Index                    | 1, 2, 4, 6    | 3.83 – 7.15   | 0.272 | 7.22  | AA | -                                                         |
| Lu11_5349141  | 11/5349141  | RT_N-                                     | 4             | 7.82          | 0.077 | 10.74 | TT | -                                                         |
| Lu11_5595131  | 11/5595131  | RV_N-, RV_N+                              | 2, 6          | 16.23 – 30.83 | 0.350 | 0.85  | GG | <i>Lus10038251</i>                                        |
| Lu11_6444164  | 11/6444164  | PDW_Index                                 | 4             | 5.70          | 0.183 | 7.33  | TT | -                                                         |
| Lu11_14898826 | 11/14898826 | NUE-                                      | 6             | 4.64          | 0.317 | 11.36 | TT | <i>Lus10008564</i>                                        |
| Lu11_15604119 | 11/15604119 | R/S_N+                                    | 2             | 42.15         | 0.138 | 0.34  | TT | -                                                         |
| Lu11_15873610 | 11/15873610 | TRL_Index                                 | 1             | 4.32          | 0.252 | 4.74  | GG | -                                                         |
| Lu11_16222926 | 11/16222926 | R/S_N+                                    | 6             | 6.52          | 0.098 | 4.86  | CC | <i>Lus10009900</i>                                        |
| Lu11_16959462 | 11/16959462 | NUE_Index                                 | 6             | 6.59          | 0.081 | 5.10  | TT | <i>Lus10039313, Lus10039324, Lus10039317</i>              |
| Lu11_17231523 | 11/17231523 | RT_Index                                  | 2, 4, 6       | 4.94 – 8.72   | 0.386 | 7.24  | TT | <i>Lus10039278</i>                                        |
| Lu11_17749943 | 11/17749943 | SDW_Index                                 | 4             | 4.41          | 0.325 | 2.80  | GG | <i>Lus10031655, Lus10031652</i>                           |
| Lu12_308207   | 12/308207   | RV_N+, NUE-, NUE+                         | 1, 2, 4, 6    | 4.24 – 26.81  | 0.266 | 14.05 | GG | <i>Lus10019979, Lus10019970, Lus10019975, Lus10019985</i> |
| Lu12_418795   | 12/418795   | RV_Index                                  | 1             | 7.60          | 0.265 | 9.32  | GG | <i>Lus10019979, Lus10020002, Lus10019985, Lus10020006</i> |
| Lu12_721567   | 12/721567   | RV_N+                                     | 2             | 22.00         | 0.293 | 0.46  | CC | <i>Lus10006777</i>                                        |
| Lu12_1020497  | 12/1020497  | TRL_Index                                 | 4, 6          | 4.36 – 5.43   | 0.260 | 4.40  | AA | <i>Lus10036176</i>                                        |
| Lu12_1371982  | 12/1371982  | RV_N-                                     | 6             | 10.41         | 0.264 | 1.09  | GG | -                                                         |
| Lu12_1386203  | 12/1386203  | RT_N+, R/S_N-                             | 2, 4          | 4.82 – 5.10   | 0.268 | 5.26  | TT | <i>Lus10036251</i>                                        |
| Lu12_1606069  | 12/1606069  | PDW_N+                                    | 2             | 5.96          | 0.333 | 4.63  | TT | -                                                         |
| Lu12_1841489  | 12/1841489  | RV_N+                                     | 2             | 15.40         | 0.244 | 2.93  | CC | -                                                         |
| Lu12_2350248  | 12/2350248  | RT_N-, RT_Index,<br>NUE_Index             | 1, 2, 3, 4, 6 | 3.70 – 9.98   | 0.496 | 7.53  | GG | <i>Lus10023238, Lus10023230</i>                           |
| Lu12_4187854  | 12/4187854  | RT_Index                                  | 3             | 4.49          | 0.439 | 13.44 | CC | <i>Lus10016554</i>                                        |
| Lu12_4334157  | 12/4334157  | PDW_N+                                    | 1             | 6.09          | 0.339 | 12.69 | CC | <i>Lus10016554, Lus10016545</i>                           |

|               |             |                                          |         |              |       |       |    |                                              |
|---------------|-------------|------------------------------------------|---------|--------------|-------|-------|----|----------------------------------------------|
| Lu12_4546209  | 12/4546209  | R/S_N+                                   | 2       | 25.64        | 0.350 | 0.29  | GG | -                                            |
| Lu12_5158397  | 12/5158397  | R/S_N+                                   | 2       | 25.14        | 0.398 | 0.13  | GG | <i>Lus10018301</i>                           |
| Lu12_6465853  | 12/6465853  | RV_N+                                    | 2       | 70.89        | 0.431 | 1.78  | CC | <i>Lus10016819, Lus10016833</i>              |
| Lu12_14028030 | 12/14028030 | RT_Index                                 | 2, 4    | 3.85 – 6.26  | 0.211 | 6.24  | AA | -                                            |
| Lu12_14495719 | 12/14495719 | R/S_N-                                   | 6       | 14.52        | 0.191 | 3.66  | AA | -                                            |
| Lu12_15997644 | 12/15997644 | R/S_N-, R/S_N+                           | 2, 6    | 5.57 – 11.44 | 0.110 | 10.48 | GG | -                                            |
| Lu12_18307372 | 12/18307372 | RV_N+, R/S_N-                            | 2, 4    | 4.50 – 17.03 | 0.439 | 2.33  | TT | <i>Lus10034156</i>                           |
| Lu12_18519589 | 12/18519589 | RV_Index                                 | 2, 4, 6 | 6.22 – 10.15 | 0.098 | 10.02 | GG | -                                            |
| Lu12_18713836 | 12/18713836 | SDW_Index,<br>PDW_Index, NUE+,<br>R/S_N- | 2, 3, 6 | 4.33 – 8.20  | 0.382 | 3.69  | AA | <i>Lus10003058</i>                           |
| Lu12_19289913 | 12/19289913 | SDW_Index                                | 2       | 4.83         | 0.146 | 2.54  | AA | <i>Lus10033664</i>                           |
| Lu12_20223199 | 12/20223199 | R/S_N+                                   | 2, 4, 6 | 4.12 – 26.81 | 0.130 | 2.91  | AA | -                                            |
| Lu13_28309    | 13/28309    | TRL_Index                                | 1       | 4.72         | 0.190 | 6.55  | CC | -                                            |
| Lu13_340653   | 13/340653   | RV_N+                                    | 2       | 33.67        | 0.281 | 0.49  | AA | -                                            |
| Lu13_492674   | 13/492674   | RV_N+                                    | 2       | 10.63        | 0.236 | 0.33  | CC | -                                            |
| Lu13_720051   | 13/720051   | TRL_N+, RV_N+                            | 2, 6    | 3.87 – 43.82 | 0.220 | 5.77  | TT | <i>Lus10008052</i>                           |
| Lu13_820912   | 13/820912   | PDW_N-                                   | 1       | 4.68         | 0.285 | 4.49  | TT | -                                            |
| Lu13_874776   | 13/874776   | RV_N+                                    | 2       | 31.67        | 0.232 | 0.63  | GG | -                                            |
| Lu13_1763895  | 13/1763895  | RT_N+                                    | 4       | 4.53         | 0.089 | 3.18  | AA | <i>Lus10001338</i>                           |
| Lu13_2852677  | 13/2852677  | PDW_N+                                   | 6       | 6.07         | 0.199 | 2.02  | GG | -                                            |
| Lu13_3455092  | 13/3455092  | R/S_N-                                   | 2, 6    | 5.65 – 6.03  | 0.358 | 2.68  | CC | <i>Lus10026061</i>                           |
| Lu13_4010608  | 13/4010608  | RT_N-                                    | 2       | 5.10         | 0.224 | 5.17  | AA | <i>Lus10002739, Lus10002741</i>              |
| Lu13_5496902  | 13/5496902  | NUE-, NUE+,<br>NUE_STI                   | 1, 2, 4 | 3.73 – 8.89  | 0.270 | 11.07 | CC | <i>Lus10011530</i>                           |
| Lu13_5626614  | 13/5626614  | R/S_N+                                   | 2       | 37.20        | 0.146 | 0.16  | AA | <i>Lus10011576</i>                           |
| Lu13_5925834  | 13/5925834  | PDW_N-                                   | 4       | 3.84         | 0.061 | 6.33  | TT | <i>Lus10004297, Lus10004302, Lus10004289</i> |
| Lu13_7087309  | 13/7087309  | RT_Index                                 | 1       | 5.89         | 0.438 | 23.07 | CC | -                                            |
| Lu13_8092006  | 13/8092006  | PDW_Index                                | 1       | 5.29         | 0.347 | 12.18 | GG | -                                            |
| Lu13_10246937 | 13/10246937 | TRL_Index                                | 2       | 5.57         | 0.256 | 4.27  | AA | -                                            |
| Lu13_10595042 | 13/10595042 | RV_Index                                 | 2       | 5.79         | 0.374 | 5.41  | AA | -                                            |
| Lu13_10711791 | 13/10711791 | TRL_Index,<br>RV_Index                   | 4, 6    | 4.15 – 5.20  | 0.358 | 5.63  | GG | -                                            |
| Lu13_11127657 | 13/11127657 | PDW_N-, RV_N+                            | 1, 2    | 4.11 – 13.27 | 0.169 | 2.66  | GG | <i>Lus10032866</i>                           |
| Lu13_11656001 | 13/11656001 | R/S_N-                                   | 6       | 6.71         | 0.122 | 2.73  | GG | -                                            |
| Lu13_13257585 | 13/13257585 | NUE+                                     | 6       | 5.07         | 0.175 | 2.28  | AA | -                                            |
| Lu13_14182845 | 13/14182845 | RV_N+                                    | 2       | 26.35        | 0.167 | 0.59  | CC | -                                            |
| Lu13_17243516 | 13/17243516 | NUE+                                     | 4       | 9.28         | 0.114 | 10.82 | TT | <i>Lus10025586</i>                           |

|               |             |                                                                               |               |              |       |       |    |                                 |
|---------------|-------------|-------------------------------------------------------------------------------|---------------|--------------|-------|-------|----|---------------------------------|
| Lu13_17528763 | 13/17528763 | PDW_Index                                                                     | 2             | 4.38         | 0.122 | 4.14  | TT | -                               |
| Lu13_18363934 | 13/18363934 | RT_Index                                                                      | 2, 4          | 5.22 – 13.33 | 0.301 | 5.30  | GG | <i>Lus10030902, Lus10030878</i> |
| Lu13_19124582 | 13/19124582 | RV_N+, R/S_N+                                                                 | 2, 4          | 4.40 – 99.03 | 0.163 | 2.39  | GG | <i>Lus10030488, Lus10030483</i> |
| Lu13_19396336 | 13/19396336 | NUE_STI                                                                       | 2, 6          | 6.47 – 7.02  | 0.146 | 13.13 | AA | -                               |
| Lu13_19514686 | 13/19514686 | SDW_N-, PDW_N-,<br>RV_N-, NUE-,<br>SDW_N+, PDW_N+,<br>TRL_N+, RV_N+,<br>RT_N+ | 1, 2, 3, 4, 6 | 3.75 – 82.77 | 0.231 | 12.85 | TT | -                               |
| Lu13_19525774 | 13/19525774 | TRL_N-, RV_N-,<br>RT_N-                                                       | 1, 2, 3, 4, 6 | 5.12 – 13.32 | 0.122 | 8.45  | AA | -                               |
| Lu13_19862281 | 13/19862281 | TRL_Index                                                                     | 1             | 9.15         | 0.066 | 10.73 | GG | <i>Lus10011352, Lus10011346</i> |
| Lu13_20238784 | 13/20238784 | R/S_N+                                                                        | 2             | 11.29        | 0.130 | 1.80  | TT | <i>Lus10002581</i>              |
| Lu14_361008   | 14/361008   | R/S_N+                                                                        | 2             | 38.69        | 0.094 | 0.20  | TT | <i>Lus10009468</i>              |
| Lu14_893430   | 14/893430   | NUE+                                                                          | 4             | 4.49         | 0.085 | 4.99  | CC | -                               |
| Lu14_1151456  | 14/1151456  | R/S_N+, NUE_Index                                                             | 2, 3          | 4.28 – 46.92 | 0.342 | 0.58  | CC | <i>Lus10028627</i>              |
| Lu14_1541988  | 14/1541988  | SDW_N+, PDW_N+                                                                | 6             | 5.72 – 7.51  | 0.187 | 2.27  | GG | <i>Lus10028695, Lus10028679</i> |
| Lu14_1999537  | 14/1999537  | NUE-, NUE_STI                                                                 | 2             | 5.04 – 5.56  | 0.309 | 4.92  | AA | -                               |
| Lu14_2032660  | 14/2032660  | NUE+                                                                          | 2             | 11.36        | 0.228 | 15.46 | AA | -                               |
| Lu14_2349386  | 14/2349386  | SDW_Index,<br>PDW_Index                                                       | 4, 6          | 3.87 – 6.33  | 0.130 | 3.87  | GG | -                               |
| Lu14_2844536  | 14/2844536  | RT_N+                                                                         | 6             | 5.62         | 0.285 | 2.28  | TT | -                               |
| Lu14_3036652  | 14/3036652  | NUE-, NUE_STI                                                                 | 2, 3, 6       | 3.77 – 5.76  | 0.342 | 6.62  | CC | <i>Lus10004876, Lus10004872</i> |
| Lu14_3630064  | 14/3630064  | SDW_Index,<br>PDW_Index                                                       | 2, 6          | 3.74 – 4.10  | 0.122 | 4.33  | CC | -                               |
| Lu14_3838919  | 14/3838919  | SDW_Index,<br>PDW_Index, R/S_N-                                               | 2, 4, 6       | 4.03 – 8.90  | 0.150 | 14.79 | CC | <i>Lus10021422, Lus10021428</i> |
| Lu14_4290395  | 14/4290395  | NUE_Index                                                                     | 4             | 4.67         | 0.146 | 1.18  | GG | <i>Lus10021475</i>              |
| Lu14_4771319  | 14/4771319  | RV_N-, SDW_N+                                                                 | 2, 6          | 3.88 – 4.11  | 0.077 | 3.93  | CC | <i>Lus10012517, Lus10012519</i> |
| Lu14_4932491  | 14/4932491  | SDW_N+, PDW_N+,<br>NUE+                                                       | 1, 2, 6       | 5.04 – 7.35  | 0.484 | 4.11  | TT | -                               |
| Lu14_5215316  | 14/5215316  | RV_N+                                                                         | 2             | 33.70        | 0.260 | 0.65  | CC | <i>Lus10014158</i>              |
| Lu14_5729675  | 14/5729675  | SDW_Index,<br>PDW_Index                                                       | 3             | 4.39 – 5.60  | 0.484 | 9.55  | CC | -                               |
| Lu14_6225285  | 14/6225285  | SDW_N+, PDW_N-,<br>PDW_N+                                                     | 2, 6          | 5.57 – 10.82 | 0.175 | 4.28  | CC | -                               |
| Lu14_9866805  | 14/9866805  | RV_N-                                                                         | 6             | 5.65         | 0.281 | 2.40  | GG | <i>Lus10004760, Lus10008192</i> |
| Lu14_10356043 | 14/10356043 | RT_N-                                                                         | 2, 3          | 4.70 – 5.36  | 0.301 | 5.50  | CC | <i>Lus10003748, Lus10003740</i> |

|               |             |                                  |            |              |       |       |    |                                              |
|---------------|-------------|----------------------------------|------------|--------------|-------|-------|----|----------------------------------------------|
| Lu14_12738805 | 14/12738805 | SDW_Index,<br>PDW_Index          | 2, 6       | 4.14 – 5.90  | 0.211 | 6.47  | TT | -                                            |
| Lu14_14781992 | 14/14781992 | SDW_N-                           | 2          | 4.10         | 0.187 | 2.73  | GG | -                                            |
| Lu14_15168783 | 14/15168783 | SDW_N+                           | 2          | 6.61         | 0.480 | 5.28  | GG | <i>Lus10035730</i>                           |
| Lu14_15396478 | 14/15396478 | TRL_N+, RT_N-,<br>RT_N+          | 1, 2, 6    | 3.94 – 8.29  | 0.140 | 9.75  | CC | <i>Lus10035654, Lus10035664, Lus10035673</i> |
| Lu14_15526556 | 14/15526556 | RV_N+, NUE_STI,<br>TRL_N-, RV_N- | 1, 2, 4, 6 | 3.98 – 7.71  | 0.134 | 4.79  | GG | <i>Lus10035654, Lus10035628, Lus10003231</i> |
| Lu14_15927781 | 14/15927781 | RV_N+                            | 2          | 14.14        | 0.163 | 0.32  | TT | <i>Lus10042154, Lus10042127, Lus10042128</i> |
| Lu14_17132252 | 14/17132252 | R/S_N+                           | 2          | 4.94 – 7.81  | 0.244 | 1.71  | AA | <i>Lus10005574, Lus10005578</i>              |
| Lu14_17573678 | 14/17573678 | R/S_N+                           | 2          | 13.42        | 0.118 | 0.43  | TT | -                                            |
| Lu14_17971007 | 14/17971007 | NUE_Index                        | 2          | 6.12         | 0.098 | 1.19  | GG | <i>Lus10039041</i>                           |
| Lu15_60022    | 15/60022    | SDW_Index                        | 2          | 6.91         | 0.203 | 4.77  | AA | -                                            |
| Lu15_504983   | 15/504983   | RV_N+, TRL_N+,<br>RV_N-          | 1, 2, 6    | 5.80 – 41.95 | 0.112 | 12.73 | AA | <i>Lus10002596, Lus10002599</i>              |
| Lu15_868802   | 15/868802   | R/S_N-                           | 6          | 4.89         | 0.142 | 2.94  | AA | <i>Lus10011239</i>                           |
| Lu15_5135728  | 15/5135728  | TRL_Index                        | 1          | 6.66         | 0.231 | 13.46 | CC | -                                            |
| Lu15_7036901  | 15/7036901  | TRL_N+, RV_N+                    | 2, 4, 6    | 4.57 – 76.29 | 0.089 | 3.58  | TT | <i>Lus10001481, Lus10001479</i>              |
| Lu15_7286304  | 15/7286304  | RV_N-                            | 6          | 5.90         | 0.439 | 1.16  | GG | <i>Lus10005987, Lus10005997</i>              |
| Lu15_8398899  | 15/8398899  | R/S_N+                           | 2, 6       | 6.91 – 34.58 | 0.301 | 3.24  | GG | <i>Lus10040916</i>                           |
| Lu15_8939174  | 15/8939174  | R/S_N-, TRL_Index                | 1, 3, 4    | 3.95 – 9.60  | 0.146 | 6.21  | CC | <i>Lus10040999, Lus10041030, Lus10041037</i> |
| Lu15_9126429  | 15/9126429  | SDW_N+, TRL_Index                | 1, 4       | 4.14 – 6.37  | 0.343 | 16.55 | TT | <i>Lus10041044, Lus10041072</i>              |
| Lu15_9428955  | 15/9428955  | RV_N+                            | 2          | 53.30        | 0.211 | 3.10  | AA | -                                            |
| Lu15_9529977  | 15/9529977  | RV_N+                            | 2          | 40.65        | 0.236 | 0.61  | AA | <i>Lus10041153</i>                           |
| Lu15_9732109  | 15/9732109  | NUE+                             | 6          | 5.06         | 0.285 | 1.95  | TT | -                                            |
| Lu15_9760082  | 15/9760082  | R/S_N+                           | 2          | 19.69        | 0.069 | 0.57  | GG | -                                            |
| Lu15_10090727 | 15/10090727 | NUE+, SDW_N-                     | 2          | 4.05 – 6.11  | 0.220 | 4.64  | AA | <i>Lus10041309, Lus10041285</i>              |
| Lu15_10375834 | 15/10375834 | NUE-, NUE_STI                    | 2          | 4.27 – 5.49  | 0.171 | 7.38  | CC | -                                            |
| Lu15_10407306 | 15/10407306 | NUE_STI                          | 1, 4       | 3.93 – 5.96  | 0.160 | 10.33 | CC | -                                            |
| Lu15_10539015 | 15/10539015 | R/S_N+                           | 2          | 4.34         | 0.122 | 2.90  | GG | <i>Lus10041402</i>                           |
| Lu15_11179267 | 15/11179267 | TRL_Index                        | 2, 4       | 6.05 – 6.30  | 0.276 | 4.52  | TT | -                                            |
| Lu15_13172607 | 15/13172607 | RV_N+                            | 2          | 6.12         | 0.317 | 0.71  | GG | <i>Lus10010286, Lus10010284</i>              |
| Lu15_13590145 | 15/13590145 | RT_Index                         | 2          | 5.82         | 0.110 | 6.25  | AA | <i>Lus10009967</i>                           |
| Lu15_13664294 | 15/13664294 | SDW_Index,<br>PDW_Index          | 2, 6       | 4.50 – 7.89  | 0.077 | 6.75  | CC | -                                            |
| Lu15_13811574 | 15/13811574 | NUE-                             | 3          | 4.32         | 0.317 | 6.75  | AA | <i>Lus10037978</i>                           |
| Lu15_14075063 | 15/14075063 | R/S_N+                           | 2          | 12.07        | 0.065 | 0.45  | TT | <i>Lus10037925</i>                           |
| Lu15_14211627 | 15/14211627 | TRL_N-, RV_N-                    | 2, 6       | 4.54 – 4.99  | 0.106 | 5.64  | CC | <i>Lus10037892, Lus10037894</i>              |



|               |             |                         |         |             |       |      |    |   |
|---------------|-------------|-------------------------|---------|-------------|-------|------|----|---|
| Lu15_14451884 | 15/14451884 | SDW_Index,<br>PDW_Index | 2, 3, 4 | 4.08 – 7.46 | 0.402 | 8.87 | CC | - |
| Lu15_14701381 | 15/14701381 | RV_N+                   | 2       | 19.96       | 0.195 | 1.97 | TT | - |

\*1, 2, 3, 4, 5, and 6 represent mrMLM, FASTmrMLM, FASTmrEMMA, ISIS EM-BLASSO, pKWmeB, and pLARmeB, respectively. Bold text indicates pleiotropic QTL. MAF = Minor allele frequency > 0.05

**Table S4.** Summary of read numbers and mapped reads from the RNA-Seq analysis

| Sample ID | Raw reads | HQ reads | %HQ   | Number of mapped reads | % mapped (from hq reads) |
|-----------|-----------|----------|-------|------------------------|--------------------------|
| HN-N0-R1  | 26186612  | 25634568 | 98.07 | 24026638               | 91.75                    |
| HN-N0-R2  | 31440357  | 30754943 | 97.98 | 29123044               | 92.63                    |
| HN-N0-R3  | 31591373  | 30902313 | 97.98 | 28951668               | 91.64                    |
| HN-N0-R4  | 23958564  | 23444602 | 97.97 | 22092449               | 92.21                    |
| HN-N1-R1  | 30771046  | 30125083 | 98.03 | 28168431               | 91.54                    |
| HN-N1-R2  | 33547421  | 32808879 | 97.96 | 30490536               | 90.89                    |
| HN-N1-R3  | 33866998  | 33158610 | 98.06 | 30784145               | 90.90                    |
| HN-N1-R4  | 21871133  | 21448333 | 98.23 | 19980893               | 91.36                    |
| LN-N0-R1  | 22384872  | 21953587 | 98.22 | 20731804               | 92.62                    |
| LN-N0-R2  | 25810407  | 25196537 | 97.79 | 23513530               | 91.10                    |
| LN-N0-R3  | 21399235  | 20955647 | 98.11 | 19551670               | 91.37                    |
| LN-N0-R4  | 22296996  | 21870222 | 98.24 | 20458320               | 91.75                    |
| LN-N1-R1  | 21309014  | 20826784 | 97.88 | 19387170               | 90.98                    |
| LN-N1-R2  | 21864092  | 21470869 | 98.36 | 19844818               | 90.76                    |
| LN-N1-R3  | 22994955  | 22583208 | 98.35 | 21266395               | 92.48                    |
| LN-N1-R4  | 20003344  | 19599262 | 98.11 | 18052452               | 90.25                    |

HN: High NUE accession O\_IRL\_C\_CN98192, LN: Low NUE accession O\_IND\_C\_CN98982. N0: Depleted nitrogen treatment, N1: Optimum nitrogen treatment. HQ: High quality.
